# Supplementary material
Source: Royal Society of Chemistry journal article supplement (doi:10.1039/d6qi00419a)
Supplement: d6qi00419a1.pdf [file d6qi00419a1.pdf]

## Supporting Information

### Field-Dependent $^1\text{H}$ Relaxometry as a General Probe of Hydration Dynamics in Paramagnetic $\text{Ln}^{3+}$ Complexes

Marco Ricci,<sup>a</sup> Lorenzo Risolo,<sup>a</sup> Fabio Carniato<sup>a,b</sup>, Daniela Lalli,<sup>a,b</sup>, Carlos Platas-Iglesias,<sup>c</sup> Mauro Botta<sup>a,b</sup>

<sup>a</sup> *Dipartimento di Scienze e Innovazione Tecnologica Università del Piemonte Orientale, Viale T. Michel 11,  
Alessandria 15121, Italy.*

<sup>b</sup> *Magnetic Resonance Platform (PRISMA-UPO), Università del Piemonte Orientale, Alessandria, Italy*

<sup>c</sup> *Centro Interdisciplinar de Química e Bioloxía (CICA) and Departamento de Química, Facultade de  
Ciencias Universidade da Coruña, 15071 A Coruña, Galicia, Spain*

## Contents

|                                                                                                                                                                                                                                                                                                                         |            |
|-------------------------------------------------------------------------------------------------------------------------------------------------------------------------------------------------------------------------------------------------------------------------------------------------------------------------|------------|
| <b>Data treatment</b> .....                                                                                                                                                                                                                                                                                             | <b>S4</b>  |
| <b>Table S1.</b> Electronic Configurations and Magnetic Properties of the Trivalent Lanthanide Ions. ....                                                                                                                                                                                                               | <b>S7</b>  |
| <b>Experimental and computational section</b> .....                                                                                                                                                                                                                                                                     | <b>S8</b>  |
| <i>Chemicals and Reagents</i> .....                                                                                                                                                                                                                                                                                     | S8         |
| <i>Synthesis of the complexes</i> .....                                                                                                                                                                                                                                                                                 | S8         |
| <b>Table S2.</b> The concentration of the Ln <sup>3+</sup> complex solutions under investigation. ....                                                                                                                                                                                                                  | S8         |
| <i>NMR Experiments</i> .....                                                                                                                                                                                                                                                                                            | S9         |
| <i>Relaxometric characterization</i> .....                                                                                                                                                                                                                                                                              | S9         |
| <i>Computational section</i> .....                                                                                                                                                                                                                                                                                      | S9         |
| <b>Figure S1.</b> <sup>1</sup> H chemical shift of the water signals for aqueous solutions of the investigated paramagnetic [Ln(DTPA)] <sup>2-</sup> complexes and for the diamagnetic reference. The concentrations of the Ln <sup>3+</sup> complexes are reported in Table S1.....                                    | <b>S10</b> |
| <b>Figure S2.</b> Plot of $\Delta\omega_m$ versus the Bleaney $C^D$ constant for [Ln(DTPA)] <sup>2-</sup> along the lanthanide series. The linear dependence is consistent with a dominant pseudocontact contribution and an essentially conserved structural geometry along the lanthanide series.....                 | <b>S10</b> |
| <b>Figure S3.</b> Residual plots for the simultaneous fitting of the longitudinal ( $r_1$ , black) and transverse ( $r_2$ , red) relaxivity data across the [Ln(DTPA)] <sup>2-</sup> series as a function of proton larmor frequency...S11                                                                              | <b>S11</b> |
| <b>Figure S4.</b> Distances between the metal ion and the oxygen atom of the inner sphere water molecule (left) and bond critical points values (right) for the [Ln(DTPA)] <sup>2-</sup> complexes obtained with DFT calculations.....S11                                                                               | <b>S11</b> |
| <b>Figure S5.</b> Plot of the $k_{ex}^{298}$ values calculated for the [Ln(DTPA)] <sup>2-</sup> complexes as a function of the Ln-O <sub>w</sub> distance obtained from DFT geometry optimizations. For [Gd(DTPA)] <sup>2-</sup> , the average of the values reported in the literature (303 ns) was considered.....S12 | <b>S12</b> |
| <b>Figure S6.</b> Comparison of the $r_1$ (32 MHz and 298 K) for [Ln(DTPA)] <sup>2-</sup> (black) and [Ln(AAZTA)] <sup>-</sup> (red).....S12                                                                                                                                                                            | <b>S12</b> |
| <b>Figure S7.</b> Residual plots for the simultaneous fitting of the longitudinal ( $r_1$ , black) and transverse ( $r_2$ , red) relaxivity data across the [Ln(AAZTA)] <sup>-</sup> series as a function of proton Larmor frequencyS13                                                                                 | <b>S13</b> |

|                                                                                                                                                                                                                                                                                                                                                 |            |
|-------------------------------------------------------------------------------------------------------------------------------------------------------------------------------------------------------------------------------------------------------------------------------------------------------------------------------------------------|------------|
| <b>Figure S8.</b> Plot of the $k_{\text{ex}}^{298}$ measured for the $[\text{Ln}(\text{AAZTA})]^-$ complexes as a function of Ln- $\text{O}_w$ distance obtained from DFT geometry optimizations. For $[\text{Gd}(\text{AAZTA})]^-$ , the average water residence lifetime of the two inner sphere water molecules (99 ns) was considered ..... | S13        |
| <b>Figure S9.</b> (A) $1/T_1$ and (B) $1/T_2$ $^1\text{H}$ NMRD profiles of $[\text{Dy}(\text{AAZTA})]^-$ at 283 K (blue), 298 K (black) and 310 K (red).....                                                                                                                                                                                   | S14        |
| <b>Optimized Cartesian coordinates (<math>\text{\AA}</math>) obtained with DFT calculations. ....</b>                                                                                                                                                                                                                                           | <b>S14</b> |
| <b>Table S3.</b> $[\text{La}(\text{DTPA})(\text{H}_2\text{O})]^{2-} \cdot 2\text{H}_2\text{O}$ .....                                                                                                                                                                                                                                            | S14        |
| <b>Table S4.</b> $[\text{Ce}(\text{DTPA})(\text{H}_2\text{O})]^{2-} \cdot 2\text{H}_2\text{O}$ .....                                                                                                                                                                                                                                            | S15        |
| <b>Table S5.</b> $[\text{Pr}(\text{DTPA})(\text{H}_2\text{O})]^{2-} \cdot 2\text{H}_2\text{O}$ .....                                                                                                                                                                                                                                            | S16        |
| <b>Table S6.</b> $[\text{Nd}(\text{DTPA})(\text{H}_2\text{O})]^{2-} \cdot 2\text{H}_2\text{O}$ .....                                                                                                                                                                                                                                            | S18        |
| <b>Table S7.</b> $[\text{Pm}(\text{DTPA})(\text{H}_2\text{O})]^{2-} \cdot 2\text{H}_2\text{O}$ .....                                                                                                                                                                                                                                            | S19        |
| <b>Table S8.</b> $[\text{Sm}(\text{DTPA})(\text{H}_2\text{O})]^{2-} \cdot 2\text{H}_2\text{O}$ .....                                                                                                                                                                                                                                            | S20        |
| <b>Table S9.</b> $[\text{Eu}(\text{DTPA})(\text{H}_2\text{O})]^{2-} \cdot 2\text{H}_2\text{O}$ .....                                                                                                                                                                                                                                            | S21        |
| <b>Table S10.</b> $[\text{Gd}(\text{DTPA})(\text{H}_2\text{O})]^{2-} \cdot 2\text{H}_2\text{O}$ .....                                                                                                                                                                                                                                           | S23        |
| <b>Table S11.</b> $[\text{Tb}(\text{DTPA})(\text{H}_2\text{O})]^{2-} \cdot 2\text{H}_2\text{O}$ .....                                                                                                                                                                                                                                           | S24        |
| <b>Table S12.</b> $[\text{Dy}(\text{DTPA})(\text{H}_2\text{O})]^{2-} \cdot 2\text{H}_2\text{O}$ .....                                                                                                                                                                                                                                           | S25        |
| <b>Table S13.</b> $[\text{Ho}(\text{DTPA})(\text{H}_2\text{O})]^{2-} \cdot 2\text{H}_2\text{O}$ .....                                                                                                                                                                                                                                           | S26        |
| <b>Table S14.</b> $[\text{Er}(\text{DTPA})(\text{H}_2\text{O})]^{2-} \cdot 2\text{H}_2\text{O}$ .....                                                                                                                                                                                                                                           | S28        |
| <b>Table S15.</b> $[\text{Tm}(\text{DTPA})(\text{H}_2\text{O})]^{2-} \cdot 2\text{H}_2\text{O}$ .....                                                                                                                                                                                                                                           | S29        |
| <b>Table S16.</b> $[\text{Yb}(\text{DTPA})(\text{H}_2\text{O})]^{2-} \cdot 2\text{H}_2\text{O}$ .....                                                                                                                                                                                                                                           | S30        |
| <b>Table S17.</b> $[\text{Lu}(\text{DTPA})(\text{H}_2\text{O})]^{2-} \cdot 2\text{H}_2\text{O}$ .....                                                                                                                                                                                                                                           | S31        |
| <b>Table S18.</b> $[\text{La}(\text{AAZTA})(\text{H}_2\text{O})_2]^- \cdot 4\text{H}_2\text{O}$ .....                                                                                                                                                                                                                                           | S33        |
| <b>Table S19.</b> $[\text{Ce}(\text{AAZTA})(\text{H}_2\text{O})_2]^- \cdot 4\text{H}_2\text{O}$ .....                                                                                                                                                                                                                                           | S34        |
| <b>Table S20.</b> $[\text{Pr}(\text{AAZTA})(\text{H}_2\text{O})_2]^- \cdot 4\text{H}_2\text{O}$ .....                                                                                                                                                                                                                                           | S35        |
| <b>Table S21.</b> $[\text{Nd}(\text{AAZTA})(\text{H}_2\text{O})_2]^- \cdot 4\text{H}_2\text{O}$ .....                                                                                                                                                                                                                                           | S37        |
| <b>Table S22.</b> $[\text{Pm}(\text{AAZTA})(\text{H}_2\text{O})_2]^- \cdot 4\text{H}_2\text{O}$ .....                                                                                                                                                                                                                                           | S38        |
| <b>Table S23.</b> $[\text{Sm}(\text{AAZTA})(\text{H}_2\text{O})_2]^- \cdot 4\text{H}_2\text{O}$ .....                                                                                                                                                                                                                                           | S40        |

|                                                                                               |     |
|-----------------------------------------------------------------------------------------------|-----|
| <b>Table S24.</b> [Eu(AAZTA)(H <sub>2</sub> O) <sub>2</sub> ] $\cdot$ 4H <sub>2</sub> O ..... | S41 |
| <b>Table S25.</b> [Gd(AAZTA)(H <sub>2</sub> O) <sub>2</sub> ] $\cdot$ 4H <sub>2</sub> O.....  | S42 |
| <b>Table S26.</b> [Tb(AAZTA)(H <sub>2</sub> O) <sub>2</sub> ] $\cdot$ 4H <sub>2</sub> O ..... | S44 |
| <b>Table S27.</b> [Dy(AAZTA)(H <sub>2</sub> O) <sub>2</sub> ] $\cdot$ 4H <sub>2</sub> O.....  | S45 |
| <b>Table S28.</b> [Ho(AAZTA)(H <sub>2</sub> O) <sub>2</sub> ] $\cdot$ 4H <sub>2</sub> O.....  | S47 |
| <b>Table S29.</b> [Er(AAZTA)(H <sub>2</sub> O)] $\cdot$ 5H <sub>2</sub> O .....               | S48 |
| <b>Table S30.</b> [Tm(AAZTA)(H <sub>2</sub> O)] $\cdot$ 5H <sub>2</sub> O .....               | S49 |
| <b>Table S31.</b> [Yb(AAZTA)(H <sub>2</sub> O)] $\cdot$ 5H <sub>2</sub> O.....                | S51 |
| <b>Table S32.</b> [Lu(AAZTA)(H <sub>2</sub> O)] $\cdot$ 5H <sub>2</sub> O .....               | S52 |
| <b>References</b> .....                                                                       | S54 |

## Data treatment

The presence of a paramagnetic complex in solution causes an increase in the longitudinal ( $R_1$ ) and transverse ( $R_2$ ) magnetic relaxation rates of the proton nuclei of the water molecules. The observed relaxation rate ( $R_i^{obs}$ ) is usually expressed as a sum of the diamagnetic ( $R_i^d$ ) and paramagnetic ( $R_i^p$ ) contributions:

$$R_i^{obs} = R_i^d + R_i^p \quad \text{with } i = 1,2 \quad (S1)$$

In the absence of solute-solute interactions, the solvent relaxation rates are linearly dependent on the concentration of the paramagnetic species ( $[M]$ ).<sup>1</sup>

$$R_i^{obs} = R_i^d + r_i[M] \quad (S2)$$

The angular coefficient of the linear equation (S2) is known as relaxivity ( $r_i$ ). It is defined as the increase in the relaxation rate of water protons in the presence of a 1 mM concentration of the paramagnetic ion. The chemical interactions that bring the water protons into the immediate proximity of the metal ion play an important role in transmitting the paramagnetic effect to the bulk.<sup>2</sup> Relaxivity is described by three contributions, depending on the type of interaction:

$$r_i = r_i^{IS} + r_i^{SS} + r_i^{OS} \quad (S3)$$

The inner-sphere (IS) contribution to relaxivity originates from water molecules directly coordinated to the metal centre. The outer-sphere (OS) contribution is associated with bulk water molecules diffusing near the paramagnetic complex. The second-sphere (SS) contribution arises from water molecules interacting with the complex, generally via hydrogen bonds, and characterized by a residence time long enough to enable effective paramagnetic relaxation.<sup>3</sup> For hydrated complexes, the relaxation enhancement is usually principally given by the inner sphere contribution, described by:

$$\left(\frac{1}{T_1}\right)_{IS} = \frac{1}{1000} \cdot \frac{C \times q}{55.56} \cdot \frac{1}{T_{1M} + \tau_M} = \frac{p_m}{T_{1M} + \tau_M} \quad (S4)$$

$$\left(\frac{1}{T_2}\right)_{IS} = \frac{p_m}{\tau_M} \cdot \frac{T_{2M}^{-1}(T_{2M}^{-1} + \tau_M^{-1}) + \Delta\omega_M^2}{(T_{2M}^{-1} + \tau_M^{-1})^2 + \Delta\omega_M^2} \quad (S5)$$

Where  $p_m$  is the mole fraction of the bound water molecules;  $q$  is the number of inner-sphere water molecules (hydration number);  $\tau_M$  is the residence time of an inner-sphere water molecule;  $T_{1M}$  and  $T_{2M}$  are the longitudinal and transverse proton relaxation times of bound water, respectively; and  $\Delta\omega_M$  is the <sup>1</sup>H chemical shift difference between the bound water and bulk-water resonances (in the absence of chemical exchange).

In accordance with the Solomon-Bloembergen-Morgan (SBM) theory,  $T_{1M}$  and  $T_{2M}$  can be further described as the sum of three mechanisms: dipole-dipole (DD), scalar (SC) and Curie (Cu).<sup>4,5</sup>

$$\frac{1}{T_{kM}} = \frac{1}{T_k^{DD}} + \frac{1}{T_k^{SC}} + \frac{1}{T_k^{Cu}} \quad (S6)$$

For Ln(III) hydrated complexes, the scalar coupling constant  $A/\hbar$  is usually small, so the  $1/T_k^{SC}$  can be neglected.<sup>6,7</sup> The dipole-dipole and Curie contributions for both the longitudinal and transverse relaxation process are defined as:

$$\left(\frac{1}{T_1^{DD}}\right)_{IS} = \frac{2}{15} \left(\frac{\mu_0}{4\pi}\right)^2 \frac{\gamma_I^2 g_J^2 \mu_B^2}{r^6} J(J+1) \left[ \frac{7\tau_{c2}}{1 + \omega_S^2 \tau_{c2}^2} + \frac{3\tau_{c1}}{1 + \omega_I^2 \tau_{c1}^2} \right] \quad (S7)$$

$$\left(\frac{1}{T_2^{DD}}\right)_{IS} = \frac{1}{15} \left(\frac{\mu_0}{4\pi}\right)^2 \frac{\gamma_I^2 g_J^2 \mu_B^2}{r^6} J(J+1) \left[ \frac{13\tau_{c2}}{1 + \omega_S^2 \tau_{c2}^2} + \frac{3\tau_{c1}}{1 + \omega_I^2 \tau_{c1}^2} + 4\tau_{c1} \right] \quad (S8)$$

$$\left(\frac{1}{T_1^{Cu}}\right)_{IS} = \frac{2}{5} \left(\frac{\mu_0}{4\pi}\right)^2 \frac{\omega_I^2 \mu_B^4 g_J^4}{(3k_B T)^2 r^6} J^2 (J+1)^2 \left( \frac{3\tau_{Cu}}{1 + \omega_S^2 \tau_{Cu}^2} \right) \quad (S9)$$

$$\left(\frac{1}{T_2^{Cu}}\right)_{IS} = \frac{1}{5} \left(\frac{\mu_0}{4\pi}\right)^2 \frac{\omega_I^2 \mu_B^4 g_J^4}{(3k_B T)^2 r^6} J^2 (J+1)^2 \left( 4\tau_{Cu} + \frac{3\tau_{Cu}}{1 + \omega_I^2 \tau_{Cu}^2} \right) \quad (S10)$$

Where  $J$  is the total spin quantum number;  $\gamma_I$  is the nuclear gyromagnetic ratio;  $g_J$  is the Landé g-factor;  $\mu_B$  is the Bohr magneton;  $r$  is the nuclear spin – electron distance;  $\omega_I$  and  $\omega_S$  are the nuclear and electron Larmor frequencies and  $k_B$  is the Boltzmann constant.<sup>8,9</sup> For each lanthanide ion, the Landé g-factor and the effective magnetic moment ( $\mu_{eff}$ ) (reported in Table S1) were obtained using the following equations:

$$g_J \approx 1 + \frac{J(J+1) - L(L+1) + S(S+1)}{2J(J+1)} \quad (S11)$$

$$\mu_{eff} = g_J \sqrt{J(J+1)} \quad (S12)$$

The correlation times, that appear in eqn. (S7)-(S10), are defined as follows:

$$\frac{1}{\tau_{ci}} = \frac{1}{\tau_R} + \frac{1}{\tau_M} + \frac{1}{T_{ie}} \quad (S13)$$

$$\frac{1}{\tau_{Cu}} = \frac{1}{\tau_R} + \frac{1}{\tau_M} \quad (S14)$$

Where  $\tau_R$  is the rotational correlation time,  $\tau_M$  is the average water residence lifetime, and  $T_{1e}$  and  $T_{2e}$  are the longitudinal and transverse electronic relaxation times. For all paramagnetic Ln<sup>3+</sup> (except Gd<sup>3+</sup>), the value of  $T_{2e}$  is small and very close to  $T_{1e}$ , so a single parameter ( $\tau_s$ ) can be used.<sup>10,11</sup>

The outer-sphere is also given by the sum of the dipolar and Curie relaxations which are commonly described by the Freed<sup>12,13</sup> and Ayant<sup>14</sup> models:

$$\left(\frac{1}{T_1^{DD}}\right)_{OS} = \frac{32\pi(\mu_0)^2 N_A[M]}{405(4\pi)^2 aD} \gamma_I^2 \mu_B^2 g^2 J(J+1) [7J_2(\omega_S) + 3J_1(\omega_I)] \quad (S15)$$

$$\left(\frac{1}{T_2^{DD}}\right)_{OS} = \frac{16\pi(\mu_0)^2 N_A[M]}{405(4\pi)^2 aD} \gamma_I^2 \mu_B^2 g^2 J(J+1) [13J_2(\omega_S) + 3J_1(\omega_I) + 4J_1(0)] \quad (S16)$$

$$J_k(\omega) = \text{Re} \left[ \frac{1 + \frac{1}{4} \left( i\omega\tau_D + \frac{\tau_D}{T_{ke}} \right)^{\frac{1}{2}}}{1 + \left( i\omega\tau_D + \frac{\tau_D}{T_{ke}} \right)^{\frac{1}{2}} + \frac{4}{9} \left( i\omega\tau_D + \frac{\tau_D}{T_{ke}} \right) + \frac{1}{9} \left( i\omega\tau_D + \frac{\tau_D}{T_{ke}} \right)^{\frac{3}{2}}} \right] \quad (S17)$$

$$\left(\frac{1}{T_1^{Cu}}\right)_{OS} = \frac{96\pi(\mu_0)^2 N_A[M] \omega_I^2 \mu_B^4 g^4}{405(4\pi)^2 aD (3k_B T)^2} J^2(J+1)^2 [J(\omega_I)] \quad (S18)$$

$$\left(\frac{1}{T_2^{Cu}}\right)_{OS} = \frac{48\pi(\mu_0)^2 \omega_I^2 \mu_B^4 g^4}{405(4\pi)^2 (3k_B T)^2} J^2(J+1)^2 [4J(0) + 3J(\omega_I)] \quad (S19)$$

$$J(\omega) = \text{Re} \left[ \frac{1 + \frac{1}{4} (i\omega\tau_D)^{\frac{1}{2}}}{1 + (i\omega\tau_D)^{\frac{1}{2}} + \frac{4}{9} (i\omega\tau_D) + \frac{1}{9} (i\omega\tau_D)^{\frac{3}{2}}} \right] \quad (S20)$$

Where  $N_A$  is Avogadro constant,  $a$  is the nuclear spin – electron distance for the OS,  $D$  is the diffusion coefficient,  $\tau_D$  is the correlation time for the translational diffusion such that  $\tau_D = a^2/D$ , while  $J(\omega)$  is the spectral density function. The temperature dependence of the water exchange rate constant ( $k_{ex}$ ) is described by eqn (S21) where  $\Delta H_M$  is the activation enthalpy.<sup>15</sup>

$$k_{ex} = \frac{1}{\tau_M} = \frac{k_{ex}^{298}}{298.15} \exp \left[ \frac{\Delta H_M}{R} \left( \frac{1}{298.15} - \frac{1}{T} \right) \right] = \frac{k_B T}{h} \exp \left( \frac{\Delta S}{R} - \frac{\Delta H_M}{RT} \right) \quad (21)$$

The temperature dependence of correlation times and diffusion constant is assumed to follow Arrhenius-type equations.

$$\tau_R = \tau_R^{298} \exp \left[ \frac{E_R}{R} \left( \frac{1}{T} - \frac{1}{298.15} \right) \right] \quad (S22)$$

$$\tau_s = \tau_s^{298} \exp \left[ \frac{E_s}{R} \left( \frac{1}{T} - \frac{1}{298.15} \right) \right] \quad (S23)$$

$$D = D^{298} \exp \left[ \frac{E_D}{R} \left( \frac{1}{298.15} - \frac{1}{T} \right) \right] \quad (S24)$$

**Table S1.** Electronic Configurations and Magnetic Properties of the Trivalent Lanthanide Ions.<sup>a</sup>

| Lanthanide ion   | 4f configuration | Spectroscopic ground state symbol | $S$ | $L$ | $J$  | $g_J$ | $\mu_{\text{eff}}$ |
|------------------|------------------|-----------------------------------|-----|-----|------|-------|--------------------|
| La <sup>3+</sup> | 4f <sup>0</sup>  | <sup>1</sup> S <sub>0</sub>       | –   | –   | –    | –     | –                  |
| Ce <sup>3+</sup> | 4f <sup>1</sup>  | <sup>2</sup> F <sub>5/2</sub>     | 1/2 | 3   | 5/2  | 6/7   | 2.54               |
| Pr <sup>3+</sup> | 4f <sup>2</sup>  | <sup>3</sup> H <sub>4</sub>       | 1   | 5   | 4    | 4/5   | 3.58               |
| Nd <sup>3+</sup> | 4f <sup>3</sup>  | <sup>4</sup> I <sub>9/2</sub>     | 3/2 | 6   | 9/2  | 8/11  | 3.62               |
| Pm <sup>3+</sup> | 4f <sup>4</sup>  | <sup>5</sup> I <sub>4</sub>       | 2   | 6   | 4    | 3/5   | 2.68               |
| Sm <sup>3+</sup> | 4f <sup>5</sup>  | <sup>6</sup> H <sub>5/2</sub>     | 5/2 | 5   | 5/2  | 2/7   | 0.85               |
| Eu <sup>3+</sup> | 4f <sup>6</sup>  | <sup>7</sup> F <sub>0</sub>       | 3   | 3   | 0    | –     | –                  |
| Gd <sup>3+</sup> | 4f <sup>7</sup>  | <sup>8</sup> S <sub>7/2</sub>     | 7/2 | 0   | 7/2  | 2     | 7.94               |
| Tb <sup>3+</sup> | 4f <sup>8</sup>  | <sup>7</sup> F <sub>6</sub>       | 3   | 3   | 6    | 3/2   | 9.72               |
| Dy <sup>3+</sup> | 4f <sup>9</sup>  | <sup>6</sup> H <sub>15/2</sub>    | 5/2 | 5   | 15/2 | 4/3   | 10.65              |
| Ho <sup>3+</sup> | 4f <sup>10</sup> | <sup>5</sup> I <sub>8</sub>       | 2   | 6   | 8    | 5/4   | 10.60              |
| Er <sup>3+</sup> | 4f <sup>11</sup> | <sup>4</sup> I <sub>15/2</sub>    | 3/2 | 6   | 15/2 | 6/5   | 9.58               |
| Tm <sup>3+</sup> | 4f <sup>12</sup> | <sup>3</sup> H <sub>6</sub>       | 1   | 5   | 6    | 7/6   | 7.56               |
| Yb <sup>3+</sup> | 4f <sup>13</sup> | <sup>2</sup> F <sub>7/2</sub>     | 1/2 | 3   | 7/2  | 8/7   | 4.54               |
| Lu <sup>3+</sup> | 4f <sup>14</sup> | <sup>1</sup> S <sub>0</sub>       | –   | –   | –    | –     | –                  |

<sup>a</sup> From ref.16

To have an independent estimation of the  $\Delta\omega_M$ , we measured the paramagnetic shift  $\Delta\omega_p$  of the water proton signal, that is the difference in chemical shift between the water signal in the presence and in absence of the complex (see **Experimental and computational section**). Indeed, the magnetic anisotropy of Ln(III)-ions, deriving from the anisotropic distribution of electrons in the 4f orbitals being prolate for Pm(III), Sm(III), Er(III), Tm(III), and Yb(III) or oblate for Ce(III), Pr(III), Nd(III), Tb(III), Dy(III), and Ho(III), shifts the proton NMR signal of water from its diamagnetic value.<sup>17,18</sup> The  $\Delta\omega_p$  value is given by:

$$\Delta\omega_p = fq \frac{\Delta\omega_M}{\left(1 + \frac{\tau_M}{T_{2M}}\right)^2 + \tau_M^2 \Delta\omega_M^2} \quad (\text{S25})$$

This equation can be simplified to  $\Delta\omega_p = \frac{cq}{55.56} \Delta\omega_M$  if  $\tau_M^2 \Delta\omega_M^2 \ll 1$  and  $\frac{\tau_M}{T_{2M}} \ll 1$ .

In general, the extraction of multiple interdependent parameters (e.g.,  $\tau_R$ ,  $\tau_M$ ,  $\tau_S$ ) from NMR relaxometry data can theoretically lead to ambiguous results or local minima during the minimization procedure if the parameter space is not adequately constrained. In this work, this potential limitation is effectively overcome by the simultaneous analysis of the longitudinal and transverse relaxation rates over a remarkably broad range of magnetic fields (corresponding to proton Larmor frequencies from 30 to 600 MHz).

The uniqueness and stability of this multifield approach stem from the fact that  $r_1$  and  $r_2$  exhibit distinctly different mathematical dependencies on the underlying correlation times and operational frequencies. Specifically:

- **Longitudinal relaxivity** is predominantly sensitive to faster modulations, such as the rotational correlation time and the electronic relaxation parameters.
- **Transverse relaxivity**, conversely, includes a significant contribution at higher magnetic fields that is inherently and acutely sensitive to the water exchange kinetics.

Consequently, fitting both the  $r_1$  and  $r_2$  datasets simultaneously across a wide field range imposes stringent and orthogonal boundary conditions on the theoretical SBM model. These intrinsic constraints effectively disentangle the physical variables during the regression. As a result, the different molecular parameters are robustly determined and demonstrate a high degree of uniqueness, without being overly sensitive to the initial estimates provided for the electronic relaxation parameters. This methodological stability ensures that the extracted hydration dynamics correctly capture the physical behavior of the investigated Ln(III) complexes rather than representing mere mathematical artifacts.

## Experimental and computational section

*Chemicals and Reagents.* All chemicals were purchased from Merck/Sigma-Aldrich (St Louis, MO, USA), Thermo Fisher Scientific (Waltham, MA, USA) or BLD Pharm (Karlsruhe, Germany) and used without further purification.

*Synthesis of the complexes.* The ligands were dissolved in milliQ water and pH was adjusted to 4.5 with an aqueous solution of NaOH (1 M). Then the ligand solution was divided into 6 different aliquots. For each solution, 0.95 eq. of Ln(NO<sub>3</sub>)<sub>3</sub>·5H<sub>2</sub>O (where Ln<sup>3+</sup> = Tb<sup>3+</sup>, Dy<sup>3+</sup>, Ho<sup>3+</sup>, Er<sup>3+</sup>, Tm<sup>3+</sup>, Yb<sup>3+</sup>, Sigma-Aldrich) were added and the pH adjusted to 5.0 with NaOH. The solutions were stirred at room temperature for 24 h and neutralized with dilute HNO<sub>3</sub>. The same procedure was then repeated for the light lanthanide ions, using

$\text{Ln}(\text{NO}_3)_3 \cdot 6\text{H}_2\text{O}$  ( $\text{Ln}^{3+} = \text{Pr}^{3+}, \text{Nd}^{3+}$ ). The concentration of  $\text{Ln}^{3+}$  complexes was evaluated by  $^1\text{H}$  NMR measurements at 11.75 T and 300 K, using the Bulk Magnetic Susceptibility (BMS) method.<sup>19,20</sup>

**Table S2.** The concentration of the  $\text{Ln}^{3+}$  complex solutions under investigation.

| Conc. (mM)                      | $\text{Pr}^{3+}$ | $\text{Nd}^{3+}$ | $\text{Tb}^{3+}$ | $\text{Dy}^{3+}$ | $\text{Ho}^{3+}$ | $\text{Er}^{3+}$ | $\text{Tm}^{3+}$ | $\text{Yb}^{3+}$ |
|---------------------------------|------------------|------------------|------------------|------------------|------------------|------------------|------------------|------------------|
| $[\text{Ln}(\text{DTPA})]^{2-}$ | 33.8             | 19.8             | 26.6             | 25.7             | 26.2             | 25.5             | 26.6             | 25.7             |
| $[\text{Ln}(\text{AAZTA})]^-$   | 7.0              | 9.4              | 20.3             | 22.4             | 21.7             | 20.5             | 18.2             | 18.8             |

*NMR Experiments.*  $^1\text{H}$  spectra of the  $\text{Ln}^{3+}$  complexes were recorded at 300 K using a Bruker 500 UltraShieldTM spectrometer equipped with a 5 mm double resonance TXI probe and a wide bore 11.75 T magnet. An independent estimation of the  $\Delta\omega_{\text{M}}$  was carried out by measuring the paramagnetic shift  $\Delta\omega_{\text{p}}$  of the water proton signal in the presence and in the absence of the  $\text{Ln}^{3+}$  complexes at 11.75 T. The bulk magnetic susceptibility contribution to the observed  $^1\text{H}$  chemical shift was removed by adding *tert*-Butyl alcohol as an internal reference (10% v/v) to the samples.

*Relaxometric characterization.*  $1/T_1$  and  $1/T_2$   $^1\text{H}$  Nuclear Magnetic Relaxation Dispersion (NMRD) profiles in the 30-120 MHz frequency range were recorded with a High Field Relaxometer (Stelar, Mede (PV), Italy) equipped with the HTS-110 3T Metrology Cryogen-free Superconducting Magnet. The relaxometer operates under computer control with an absolute uncertainty of  $\pm 1\%$   $\text{s}^{-1}$ . The temperature was controlled during the measurements with a Stelar VTC-91 airflow heater equipped with a copper-constantan thermocouple (uncertainty of  $\pm 0.1\%$   $^\circ\text{C}$ ). The temperature inside the probe head was furthermore monitored with a Fluke 52k/j digital thermometer (Fluke, Zürich, Switzerland). The  $1/T_1$  data were collected using the standard inversion recovery sequence (16 experiments, 3 scans) with a conventional  $90^\circ$  pulse width of 3.5  $\mu\text{s}$ , and the reproducibility of the data was within  $\pm 0.5\%$ . The  $1/T_2$  data were collected using a standard CPMG sequence with a conventional  $90^\circ$  pulse calibrated for each sample, with a reproducibility of the data within  $\pm 1.0\%$ . The high-field  $1/T_1$  and  $1/T_2$  proton relaxation rates were recorded by means of three different NMR spectrometers: Bruker Avance Neo 400 (9.4 T), Bruker 500 UltraShieldTM (11.7 T) and Bruker Avance 600 (14.1 T). The diamagnetic contribution for both  $1/T_1$  and  $1/T_2$  was measured by collecting  $^1\text{H}$  NMRD profiles of pure water. The longitudinal and transverse relaxivities ( $r_1$  and  $r_2$ ,  $\text{mM}^{-1} \text{s}^{-1}$ ) at different magnetic fields were obtained by measuring the longitudinal and transverse relaxation rates of the paramagnetic samples, subtracting the diamagnetic contribution, and dividing by the mM concentration of the paramagnetic ion.

*Computational section:* Geometry optimizations of the  $\text{Ln}^{3+}$  complexes were performed with the Gaussian 16 program package (Rev C.01)<sup>21</sup> using restricted calculations with the wB97X-D functional and the Def2-TZVPP basis set<sup>22</sup> for C, H, N and O atoms. The Stuttgart–Bonn large-core quasi-relativistic effective core potentials were used for  $\text{Ln}^{3+}$  ions<sup>23</sup>. Solvent effects were incorporated with a polarized continuum model using the default settings [scrf = (pcm, solvent = water)] implemented in Gaussian 16<sup>24</sup>. The integration grid was increased using the integral = ultrafine keyword. Frequency calculations were used to confirm that the

optimized structures corresponded to stationary points. Wave function analysis was carried out with the computer program Multiwfn 3.2.<sup>25</sup> which allows computing the electron density ( $\rho$ ) and its Laplacian ( $\nabla^2\rho$ ) at the bond critical points (BCPs).

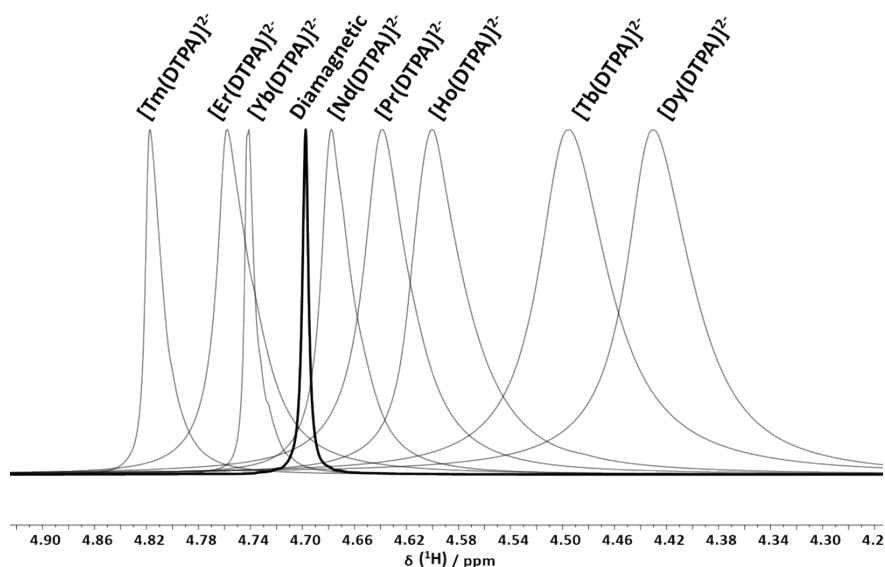

**Figure S1.**  $^1\text{H}$  chemical shift of the water signals for aqueous solutions of the investigated paramagnetic  $[\text{Ln}(\text{DTPA})]^{2-}$  complexes and for the diamagnetic reference. The concentrations of the  $\text{Ln}^{3+}$  complexes are reported in *Table S2*.

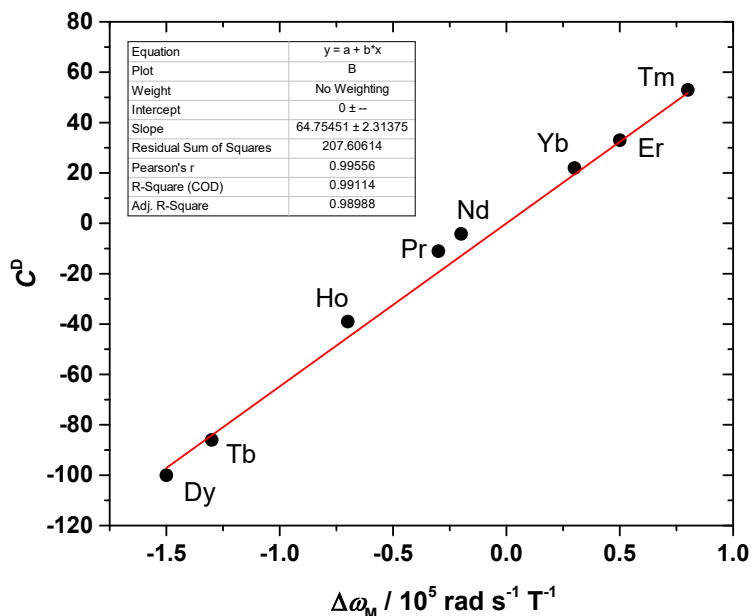

**Figure S2.** Plot of  $\Delta\omega_m$  versus the Bleaney  $C^D$  constant for  $[\text{Ln}(\text{DTPA})]^{2-}$  along the lanthanide series. The linear dependence is consistent with a dominant pseudocontact contribution and an essentially conserved structural geometry along the lanthanide series.

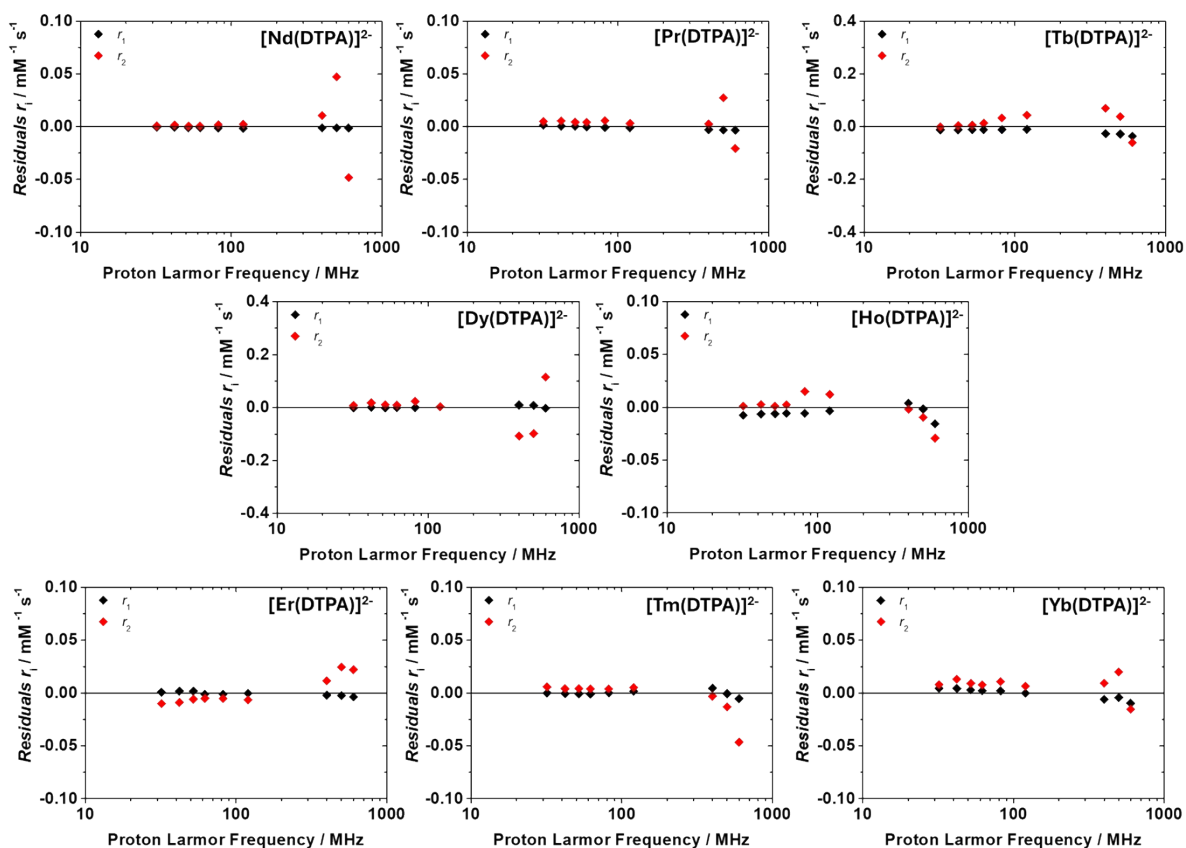

**Figure S3.** Residual plots for the simultaneous fitting of the longitudinal ( $r_1$ , black) and transverse ( $r_2$ , red) relaxivity data across the  $[\text{Ln}(\text{DTPA})]^{2-}$  series as a function of proton larmor frequency.

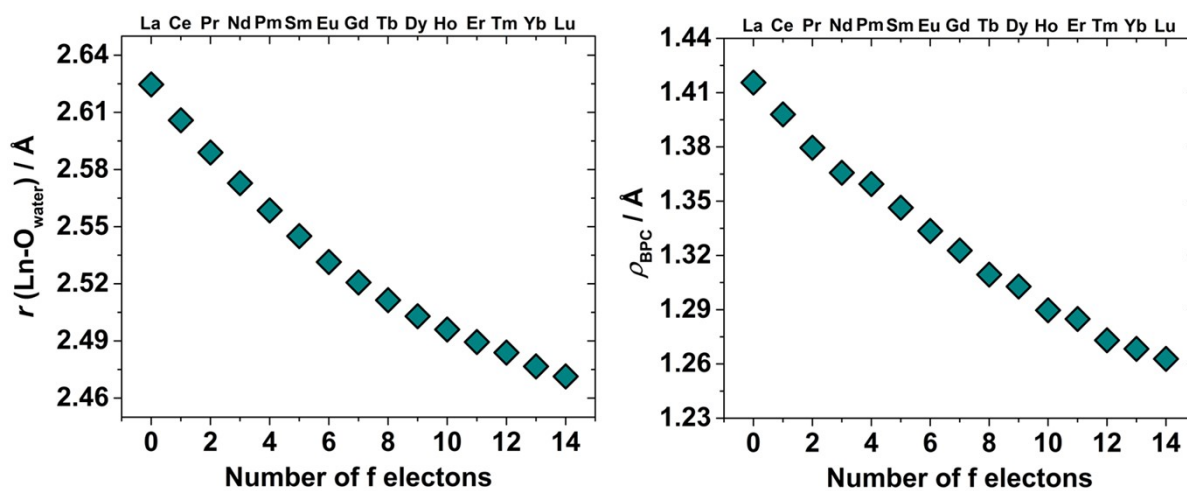

**Figure S4.** Distances between the metal ion and the oxygen atom of the inner sphere water molecule (left) and bond critical points values (right) for the  $[\text{Ln}(\text{DTPA})]^{2-}$  complexes obtained with DFT calculations.

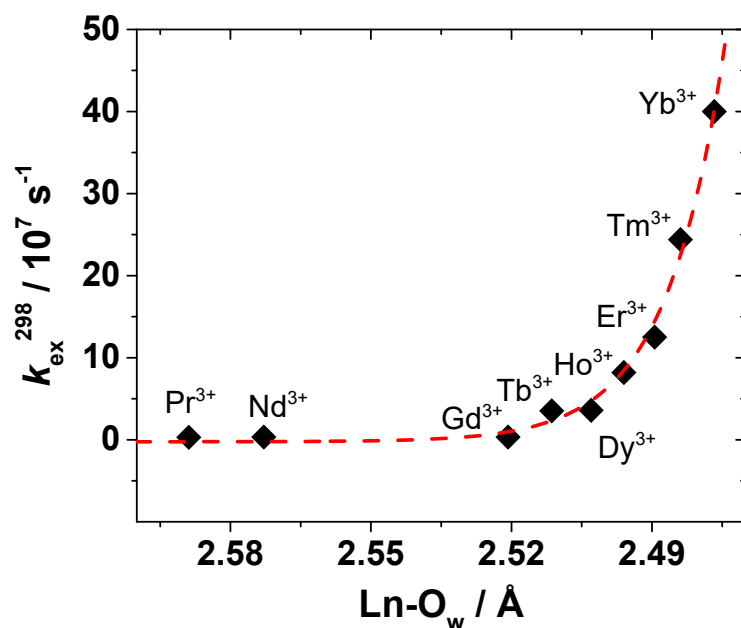

**Figure S5.** Plot of the  $k_{\text{ex}}^{298}$  values calculated for the  $[\text{Ln}(\text{DTPA})]^{2-}$  complexes as a function of Ln-O<sub>w</sub> distance obtained from DFT geometry optimizations. For  $[\text{Gd}(\text{DTPA})]^{2-}$ , the average of the values reported in the literature (303 ns)<sup>26,27,28</sup> was considered.

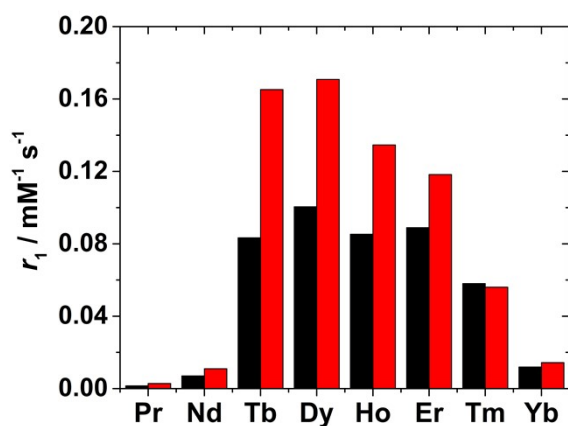

**Figure S6.** Comparison of the  $r_1$  values at 32 MHz and 298 K for  $[\text{Ln}(\text{DTPA})]^{2-}$  (**black**) and  $[\text{Ln}(\text{AAZTA})]^{-}$  (**red**).

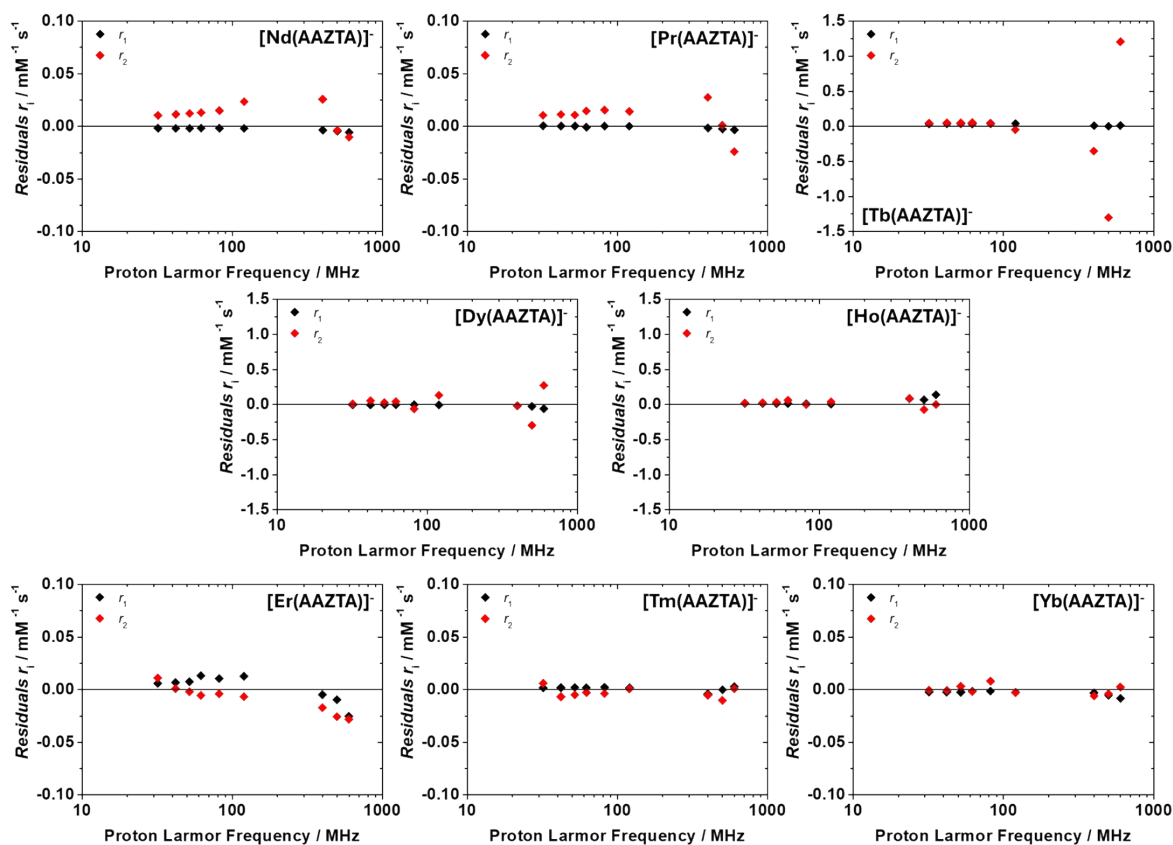

**Figure S7.** Residual plots for the simultaneous fitting of the longitudinal ( $r_1$ , black) and transverse ( $r_2$ , red) relaxivity data across the  $[\text{Ln}(\text{AAZTA})]^-$  series as a function of proton larmor frequency.

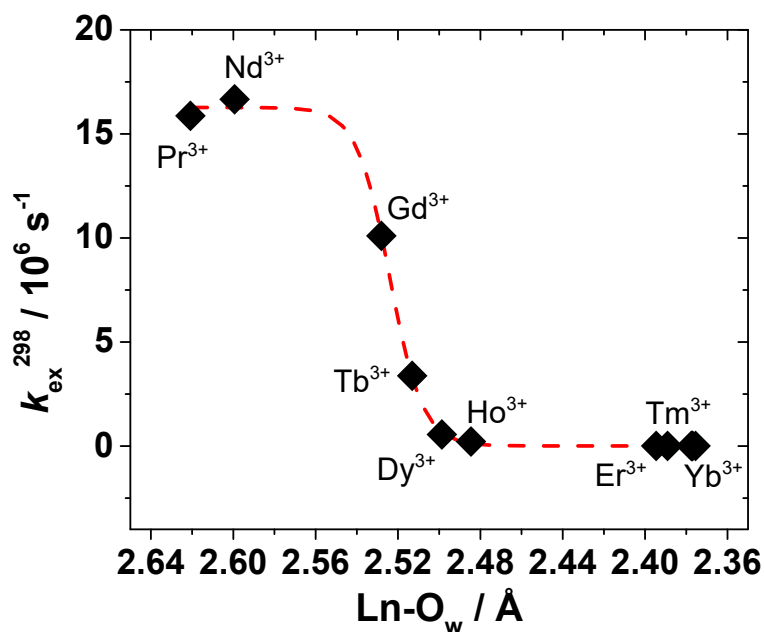

**Figure S8.** Plot of the  $k_{\text{ex}}^{298}$  measured for the  $[\text{Ln}(\text{AAZTA})]^-$  complexes as a function of  $\text{Ln}-\text{O}_w$  distance obtained from DFT geometry optimizations. For  $[\text{Gd}(\text{AAZTA})]^-$ , the average water residence lifetime of the two inner sphere water molecules (99 ns)<sup>29</sup> was considered.

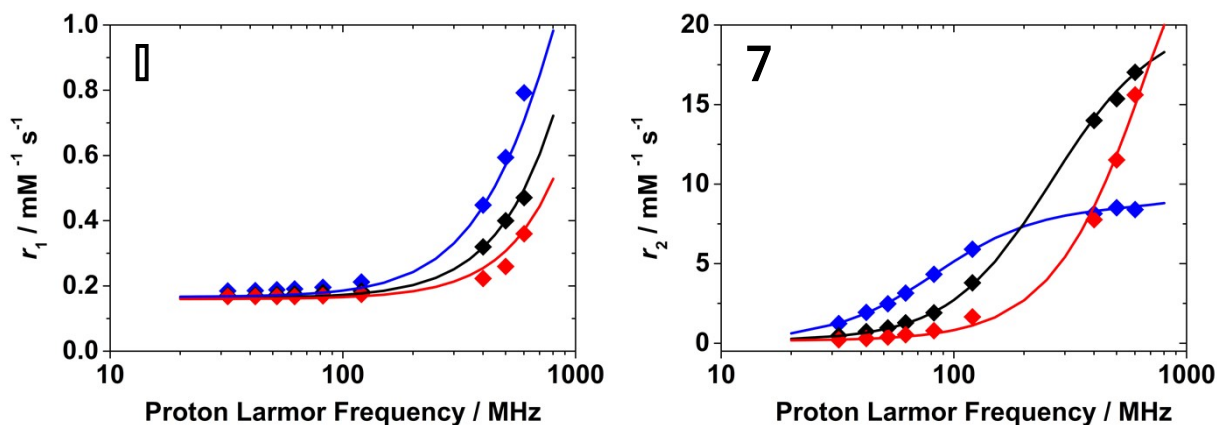

**Figure S9.** (A)  $1/T_1$  and (B)  $1/T_2$   $^1\text{H}$  NMRD profiles of  $[\text{Dy}(\text{AAZTA})]^-$  at 283 K ( $\blacklozenge$ ), 298 K ( $\blacklozenge$ ) and 310 K ( $\blacklozenge$ ).

### Optimized Cartesian coordinates ( $\text{\AA}$ ) obtained with DFT calculations

**Table S3.** Optimized Cartesian coordinates ( $\text{\AA}$ ) of the  $[\text{La}(\text{DTPA})(\text{H}_2\text{O})]^{2-} \cdot 2\text{H}_2\text{O}$  system obtained with DFT calculations (0 Imaginary Frequencies).

| Tag | Symbol | X        | Y        | Z        |
|-----|--------|----------|----------|----------|
| 1   | La     | -0.07972 | 0.397453 | 0.117346 |
| 2   | O      | -2.33044 | 1.069037 | 1.21937  |
| 3   | O      | -4.03932 | 0.567043 | 2.55883  |
| 4   | O      | -1.68768 | 0.25416  | -1.82185 |
| 5   | O      | -3.86329 | 0.628499 | -2.09984 |
| 6   | O      | 1.412562 | 0.411052 | -1.89294 |
| 7   | O      | 2.469877 | -0.54155 | -3.60473 |
| 8   | O      | 0.185531 | -1.01979 | 2.17293  |
| 9   | O      | 1.288027 | -2.10913 | 3.769999 |
| 10  | O      | 1.751925 | 1.88574  | 1.063486 |
| 11  | O      | 3.68028  | 2.769871 | 0.417005 |
| 12  | O      | -0.40009 | 2.864993 | -0.71771 |
| 13  | N      | -2.22675 | -1.49312 | 0.283713 |
| 14  | N      | 0.469377 | -2.10598 | -1.02917 |
| 15  | N      | 2.551773 | -0.66249 | 0.724269 |
| 16  | C      | -1.60562 | -2.81722 | 0.208098 |
| 17  | H      | -1.01534 | -2.95013 | 1.113683 |
| 18  | C      | -0.72778 | -2.96985 | -1.02195 |
| 19  | C      | 1.536532 | -2.74221 | -0.23751 |
| 20  | H      | 1.847563 | -3.67617 | -0.72477 |
| 21  | H      | 1.122483 | -3.01332 | 0.731782 |
| 22  | C      | 2.778969 | -1.88637 | -0.04879 |
| 23  | H      | 3.544172 | -2.51243 | 0.427048 |
| 24  | H      | 3.177481 | -1.61091 | -1.02307 |
| 25  | C      | -2.81604 | -1.23575 | 1.594078 |
| 26  | H      | -3.73376 | -1.81068 | 1.75502  |

|    |   |          |          |          |
|----|---|----------|----------|----------|
| 27 | H | -2.09007 | -1.51945 | 2.356382 |
| 28 | C | -3.11258 | 0.25204  | 1.814975 |
| 29 | C | -3.21414 | -1.24275 | -0.7749  |
| 30 | H | -4.21058 | -1.12648 | -0.34793 |
| 31 | H | -3.27382 | -2.09525 | -1.45513 |
| 32 | C | -2.90846 | -0.01286 | -1.63523 |
| 33 | C | 0.908979 | -1.86792 | -2.40966 |
| 34 | H | 0.02007  | -1.7732  | -3.03364 |
| 35 | H | 1.49304  | -2.71002 | -2.79441 |
| 36 | C | 1.683072 | -0.56515 | -2.65429 |
| 37 | C | 2.566739 | -0.91596 | 2.163459 |
| 38 | H | 3.36935  | -1.60771 | 2.43977  |
| 39 | H | 2.76127  | 0.028029 | 2.67469  |
| 40 | C | 1.244427 | -1.41342 | 2.753754 |
| 41 | C | 3.493922 | 0.398034 | 0.374777 |
| 42 | H | 3.68387  | 0.364974 | -0.69633 |
| 43 | H | 4.459133 | 0.28693  | 0.882351 |
| 44 | C | 2.941249 | 1.79917  | 0.653437 |
| 45 | O | -3.1586  | 3.000335 | -0.56729 |
| 46 | H | -1.31499 | 3.190692 | -0.74579 |
| 47 | H | 0.230297 | 3.577843 | -0.5088  |
| 48 | H | -3.42463 | 2.376564 | -1.26003 |
| 49 | H | -2.99202 | 2.412329 | 0.192575 |
| 50 | H | -2.36215 | -3.61278 | 0.188588 |
| 51 | H | -0.43927 | -4.02299 | -1.12154 |
| 52 | H | -1.3147  | -2.72374 | -1.9042  |
| 53 | O | 1.681583 | 4.642458 | -0.23287 |
| 54 | H | 2.011503 | 5.0544   | -1.03134 |
| 55 | H | 2.384837 | 4.022872 | 0.050964 |

**Table S4.** Optimized Cartesian coordinates (Å) of the  $[\text{Ce}(\text{DTPA})(\text{H}_2\text{O})]^{2-} \cdot 2\text{H}_2\text{O}$  system obtained with DFT calculations (0 Imaginary Frequencies).

| Tag | Symbol | X        | Y        | Z        |
|-----|--------|----------|----------|----------|
| 1   | Ce     | -0.07014 | 0.375469 | 0.084944 |
| 2   | O      | -2.26316 | 1.079479 | 1.210732 |
| 3   | O      | -3.96829 | 0.616059 | 2.568457 |
| 4   | O      | -1.67689 | 0.249068 | -1.82813 |
| 5   | O      | -3.85256 | 0.626581 | -2.10175 |
| 6   | O      | 1.412485 | 0.392737 | -1.90576 |
| 7   | O      | 2.438814 | -0.55633 | -3.63828 |
| 8   | O      | 0.172111 | -0.98251 | 2.153027 |
| 9   | O      | 1.244987 | -2.07624 | 3.766996 |
| 10  | O      | 1.705013 | 1.865611 | 1.074167 |
| 11  | O      | 3.634993 | 2.783699 | 0.479437 |
| 12  | O      | -0.38194 | 2.82849  | -0.73711 |
| 13  | N      | -2.21293 | -1.48795 | 0.284471 |
| 14  | N      | 0.469331 | -2.11616 | -1.03442 |
| 15  | N      | 2.543207 | -0.6626  | 0.716421 |

|    |   |          |          |          |
|----|---|----------|----------|----------|
| 16 | C | -1.59982 | -2.81669 | 0.21804  |
| 17 | H | -1.0081  | -2.94629 | 1.123166 |
| 18 | C | -0.7258  | -2.98349 | -1.01287 |
| 19 | C | 1.545301 | -2.74502 | -0.24784 |
| 20 | H | 1.859804 | -3.67704 | -0.73618 |
| 21 | H | 1.138293 | -3.01913 | 0.723967 |
| 22 | C | 2.781598 | -1.87903 | -0.06432 |
| 23 | H | 3.555545 | -2.49951 | 0.404467 |
| 24 | H | 3.172154 | -1.59424 | -1.03908 |
| 25 | C | -2.79719 | -1.21482 | 1.594116 |
| 26 | H | -3.72892 | -1.76673 | 1.754286 |
| 27 | H | -2.08009 | -1.51454 | 2.358067 |
| 28 | C | -3.05702 | 0.279435 | 1.815377 |
| 29 | C | -3.20294 | -1.24143 | -0.77273 |
| 30 | H | -4.19851 | -1.12344 | -0.3442  |
| 31 | H | -3.26383 | -2.09595 | -1.45018 |
| 32 | C | -2.89791 | -0.01508 | -1.63761 |
| 33 | C | 0.898234 | -1.88451 | -2.41974 |
| 34 | H | 0.004932 | -1.79452 | -3.03808 |
| 35 | H | 1.481099 | -2.72732 | -2.80453 |
| 36 | C | 1.668586 | -0.58178 | -2.67481 |
| 37 | C | 2.55401  | -0.92673 | 2.153948 |
| 38 | H | 3.337597 | -1.64208 | 2.423716 |
| 39 | H | 2.776009 | 0.006367 | 2.673764 |
| 40 | C | 1.220106 | -1.39104 | 2.74303  |
| 41 | C | 3.47321  | 0.411658 | 0.378828 |
| 42 | H | 3.659096 | 0.396438 | -0.69357 |
| 43 | H | 4.441204 | 0.305115 | 0.881707 |
| 44 | C | 2.902234 | 1.800767 | 0.681488 |
| 45 | O | -3.14169 | 2.998286 | -0.57527 |
| 46 | H | -1.29745 | 3.152575 | -0.76869 |
| 47 | H | 0.23821  | 3.543155 | -0.50359 |
| 48 | H | -3.4167  | 2.369836 | -1.26032 |
| 49 | H | -2.96073 | 2.416643 | 0.185766 |
| 50 | H | -2.36072 | -3.60812 | 0.206455 |
| 51 | H | -0.43499 | -4.03694 | -1.09989 |
| 52 | H | -1.31599 | -2.75073 | -1.8966  |
| 53 | O | 1.649902 | 4.645902 | -0.18937 |
| 54 | H | 1.987054 | 5.068463 | -0.97924 |
| 55 | H | 2.357239 | 4.033866 | 0.101987 |

**Table S5.** Optimized Cartesian coordinates (Å) of the  $[\text{Pr}(\text{DTPA})(\text{H}_2\text{O})]^{2-} \cdot 2\text{H}_2\text{O}$  system obtained with DFT calculations (0 Imaginary Frequencies).

| Tag | Symbol | X        | Y        | Z        |
|-----|--------|----------|----------|----------|
| 1   | Pr     | -0.06036 | 0.35724  | 0.05783  |
| 2   | O      | -2.21009 | 1.09196  | 1.195732 |
| 3   | O      | -3.90543 | 0.662185 | 2.576263 |
| 4   | O      | -1.66368 | 0.238868 | -1.83557 |

|    |   |          |          |          |
|----|---|----------|----------|----------|
| 5  | O | -3.83842 | 0.620502 | -2.11081 |
| 6  | O | 1.415606 | 0.379686 | -1.91293 |
| 7  | O | 2.411891 | -0.56385 | -3.66587 |
| 8  | O | 0.163013 | -0.94311 | 2.136208 |
| 9  | O | 1.20485  | -2.04777 | 3.762732 |
| 10 | O | 1.664764 | 1.841822 | 1.089056 |
| 11 | O | 3.592775 | 2.792582 | 0.538681 |
| 12 | O | -0.36899 | 2.790837 | -0.76968 |
| 13 | N | -2.19942 | -1.4802  | 0.28796  |
| 14 | N | 0.470039 | -2.12174 | -1.03908 |
| 15 | N | 2.538334 | -0.66559 | 0.709878 |
| 16 | C | -1.59207 | -2.812   | 0.229031 |
| 17 | H | -0.99647 | -2.93714 | 1.132314 |
| 18 | C | -0.72445 | -2.99001 | -1.00484 |
| 19 | C | 1.55307  | -2.74659 | -0.25851 |
| 20 | H | 1.86823  | -3.67737 | -0.74835 |
| 21 | H | 1.152376 | -3.02225 | 0.71583  |
| 22 | C | 2.785227 | -1.87383 | -0.07962 |
| 23 | H | 3.566367 | -2.49099 | 0.381434 |
| 24 | H | 3.168225 | -1.57971 | -1.05449 |
| 25 | C | -2.77712 | -1.19237 | 1.597408 |
| 26 | H | -3.71842 | -1.72668 | 1.76055  |
| 27 | H | -2.06481 | -1.50101 | 2.361806 |
| 28 | C | -3.00915 | 0.306873 | 1.814117 |
| 29 | C | -3.19297 | -1.23782 | -0.76683 |
| 30 | H | -4.186   | -1.11123 | -0.33501 |
| 31 | H | -3.26108 | -2.09738 | -1.43714 |
| 32 | C | -2.88533 | -0.02018 | -1.64228 |
| 33 | C | 0.888487 | -1.89409 | -2.42847 |
| 34 | H | -0.00924 | -1.8055  | -3.04043 |
| 35 | H | 1.46859  | -2.73772 | -2.81538 |
| 36 | C | 1.657077 | -0.592   | -2.69077 |
| 37 | C | 2.544476 | -0.94151 | 2.145239 |
| 38 | H | 3.30687  | -1.68178 | 2.407446 |
| 39 | H | 2.79562  | -0.02105 | 2.674037 |
| 40 | C | 1.199199 | -1.37054 | 2.733233 |
| 41 | C | 3.456445 | 0.421532 | 0.384414 |
| 42 | H | 3.638387 | 0.423744 | -0.68885 |
| 43 | H | 4.427012 | 0.319576 | 0.88297  |
| 44 | C | 2.867954 | 1.798248 | 0.710131 |
| 45 | O | -3.12593 | 2.991987 | -0.58977 |
| 46 | H | -1.28717 | 3.108799 | -0.79699 |
| 47 | H | 0.238236 | 3.507209 | -0.50826 |
| 48 | H | -3.4087  | 2.359102 | -1.26764 |
| 49 | H | -2.935   | 2.41627  | 0.173321 |
| 50 | H | -2.35568 | -3.60078 | 0.226791 |
| 51 | H | -0.43344 | -4.04384 | -1.08434 |
| 52 | H | -1.319   | -2.76508 | -1.88765 |
| 53 | O | 1.612164 | 4.640159 | -0.14622 |

|    |   |          |          |          |
|----|---|----------|----------|----------|
| 54 | H | 1.95848  | 5.076041 | -0.9248  |
| 55 | H | 2.322726 | 4.035177 | 0.152823 |

**Table S6.** Optimized Cartesian coordinates (Å) of the [Nd(DTPA)(H<sub>2</sub>O)]<sup>2-</sup>·2H<sub>2</sub>O system obtained with DFT calculations (0 Imaginary Frequencies).

| Tag | Symbol | X        | Y        | Z        |
|-----|--------|----------|----------|----------|
| 1   | Nd     | -0.05561 | 0.346395 | 0.048418 |
| 2   | O      | -2.18209 | 1.095082 | 1.182826 |
| 3   | O      | -3.86194 | 0.686959 | 2.588386 |
| 4   | O      | -1.64696 | 0.232361 | -1.83282 |
| 5   | O      | -3.81927 | 0.611827 | -2.12845 |
| 6   | O      | 1.414283 | 0.37944  | -1.90456 |
| 7   | O      | 2.395833 | -0.55366 | -3.67121 |
| 8   | O      | 0.157719 | -0.92433 | 2.12119  |
| 9   | O      | 1.179559 | -2.02774 | 3.760831 |
| 10  | O      | 1.643018 | 1.827493 | 1.088888 |
| 11  | O      | 3.569686 | 2.795193 | 0.563247 |
| 12  | O      | -0.36419 | 2.763335 | -0.77789 |
| 13  | N      | -2.19156 | -1.47669 | 0.291714 |
| 14  | N      | 0.469074 | -2.12075 | -1.0386  |
| 15  | N      | 2.536128 | -0.66816 | 0.706359 |
| 16  | C      | -1.58871 | -2.81028 | 0.234468 |
| 17  | H      | -0.99149 | -2.93558 | 1.136652 |
| 18  | C      | -0.72418 | -2.99076 | -1.00098 |
| 19  | C      | 1.555808 | -2.74682 | -0.26403 |
| 20  | H      | 1.869658 | -3.67612 | -0.75728 |
| 21  | H      | 1.159072 | -3.02491 | 0.711395 |
| 22  | C      | 2.78671  | -1.87234 | -0.0871  |
| 23  | H      | 3.5707   | -2.48862 | 0.370264 |
| 24  | H      | 3.166316 | -1.57398 | -1.062   |
| 25  | C      | -2.76613 | -1.1821  | 1.600782 |
| 26  | H      | -3.71391 | -1.70478 | 1.764071 |
| 27  | H      | -2.05825 | -1.49814 | 2.365888 |
| 28  | C      | -2.97974 | 0.319801 | 1.815537 |
| 29  | C      | -3.1855  | -1.2332  | -0.76217 |
| 30  | H      | -4.17618 | -1.09424 | -0.32894 |
| 31  | H      | -3.26378 | -2.09687 | -1.42617 |
| 32  | C      | -2.87006 | -0.02463 | -1.64652 |
| 33  | C      | 0.881568 | -1.89033 | -2.42945 |
| 34  | H      | -0.01885 | -1.79988 | -3.03709 |
| 35  | H      | 1.460063 | -2.73298 | -2.82076 |
| 36  | C      | 1.648721 | -0.58752 | -2.69049 |
| 37  | C      | 2.538305 | -0.94945 | 2.140517 |
| 38  | H      | 3.288208 | -1.70321 | 2.399984 |
| 39  | H      | 2.805065 | -0.03602 | 2.673809 |
| 40  | C      | 1.18632  | -1.35845 | 2.726203 |
| 41  | C      | 3.448658 | 0.424685 | 0.386967 |
| 42  | H      | 3.631547 | 0.433425 | -0.6861  |

|    |   |          |          |          |
|----|---|----------|----------|----------|
| 43 | H | 4.419204 | 0.326668 | 0.886238 |
| 44 | C | 2.84962  | 1.794908 | 0.719489 |
| 45 | O | -3.12006 | 2.983868 | -0.60075 |
| 46 | H | -1.28276 | 3.080052 | -0.80839 |
| 47 | H | 0.237422 | 3.48089  | -0.50672 |
| 48 | H | -3.40313 | 2.349607 | -1.27711 |
| 49 | H | -2.92266 | 2.409972 | 0.162127 |
| 50 | H | -2.3543  | -3.59712 | 0.234774 |
| 51 | H | -0.43198 | -4.04424 | -1.07929 |
| 52 | H | -1.32091 | -2.76816 | -1.88288 |
| 53 | O | 1.591145 | 4.633537 | -0.13091 |
| 54 | H | 1.938871 | 5.071432 | -0.90773 |
| 55 | H | 2.303969 | 4.032853 | 0.172052 |

**Table S7.** Optimized Cartesian coordinates (Å) of the [Pm(DTPA)(H<sub>2</sub>O)]<sup>2-</sup> · 2H<sub>2</sub>O system obtained with DFT calculations (0 Imaginary Frequencies).

| Tag | Symbol | X        | Y        | Z        |
|-----|--------|----------|----------|----------|
| 1   | Pm     | -0.05104 | 0.335366 | 0.03959  |
| 2   | O      | -2.15089 | 1.097498 | 1.17603  |
| 3   | O      | -3.81782 | 0.709467 | 2.602139 |
| 4   | O      | -1.63252 | 0.228499 | -1.82878 |
| 5   | O      | -3.80241 | 0.605125 | -2.14397 |
| 6   | O      | 1.412354 | 0.378201 | -1.89841 |
| 7   | O      | 2.382505 | -0.54562 | -3.67611 |
| 8   | O      | 0.152033 | -0.91179 | 2.107243 |
| 9   | O      | 1.158123 | -2.01323 | 3.757609 |
| 10  | O      | 1.620743 | 1.816541 | 1.084299 |
| 11  | O      | 3.548023 | 2.79821  | 0.587341 |
| 12  | O      | -0.35805 | 2.73657  | -0.78844 |
| 13  | N      | -2.18487 | -1.47329 | 0.294455 |
| 14  | N      | 0.468156 | -2.12038 | -1.03886 |
| 15  | N      | 2.532478 | -0.6693  | 0.703401 |
| 16  | C      | -1.5866  | -2.80873 | 0.237995 |
| 17  | H      | -0.98838 | -2.93512 | 1.139318 |
| 18  | C      | -0.72438 | -2.99142 | -0.99859 |
| 19  | C      | 1.557601 | -2.74696 | -0.26834 |
| 20  | H      | 1.871047 | -3.675   | -0.76401 |
| 21  | H      | 1.163732 | -3.02704 | 0.70777  |
| 22  | C      | 2.787022 | -1.87037 | -0.09272 |
| 23  | H      | 3.573415 | -2.48533 | 0.362245 |
| 24  | H      | 3.164042 | -1.56865 | -1.06758 |
| 25  | C      | -2.75593 | -1.17288 | 1.603501 |
| 26  | H      | -3.71072 | -1.68282 | 1.766102 |
| 27  | H      | -2.0531  | -1.4984  | 2.368917 |
| 28  | C      | -2.94921 | 0.331356 | 1.819288 |
| 29  | C      | -3.1793  | -1.22807 | -0.75816 |
| 30  | H      | -4.16771 | -1.07814 | -0.32348 |
| 31  | H      | -3.26699 | -2.0949  | -1.41698 |

|    |   |          |          |          |
|----|---|----------|----------|----------|
| 32 | C | -2.85685 | -0.02731 | -1.64978 |
| 33 | C | 0.876933 | -1.88867 | -2.43069 |
| 34 | H | -0.02485 | -1.79883 | -3.03623 |
| 35 | H | 1.455753 | -2.73014 | -2.82395 |
| 36 | C | 1.641694 | -0.58463 | -2.69086 |
| 37 | C | 2.531406 | -0.95439 | 2.136667 |
| 38 | H | 3.272531 | -1.71724 | 2.394532 |
| 39 | H | 2.808479 | -0.04604 | 2.673399 |
| 40 | C | 1.174564 | -1.34985 | 2.719285 |
| 41 | C | 3.439879 | 0.428661 | 0.389108 |
| 42 | H | 3.623662 | 0.442888 | -0.68376 |
| 43 | H | 4.4103   | 0.334446 | 0.889211 |
| 44 | C | 2.831322 | 1.793095 | 0.727027 |
| 45 | O | -3.1136  | 2.975703 | -0.60777 |
| 46 | H | -1.27683 | 3.052184 | -0.82154 |
| 47 | H | 0.237882 | 3.454711 | -0.50669 |
| 48 | H | -3.39815 | 2.340102 | -1.28215 |
| 49 | H | -2.90863 | 2.40408  | 0.154711 |
| 50 | H | -2.35432 | -3.59348 | 0.23972  |
| 51 | H | -0.43158 | -4.04472 | -1.07585 |
| 52 | H | -1.32265 | -2.77048 | -1.87988 |
| 53 | O | 1.571837 | 4.628587 | -0.1177  |
| 54 | H | 1.921706 | 5.067727 | -0.89285 |
| 55 | H | 2.286206 | 4.031904 | 0.189903 |

**Table S8.** Optimized Cartesian coordinates (Å) of the  $[\text{Sm}(\text{DTPA})(\text{H}_2\text{O})]^{2-} \cdot 2\text{H}_2\text{O}$  system obtained with DFT calculations (0 Imaginary Frequencies).

| Tag | Symbol | X        | Y        | Z        |
|-----|--------|----------|----------|----------|
| 1   | Sm     | -0.04839 | 0.326671 | 0.033109 |
| 2   | O      | -2.12462 | 1.098136 | 1.172775 |
| 3   | O      | -3.77784 | 0.725475 | 2.618479 |
| 4   | O      | -1.62004 | 0.225859 | -1.8234  |
| 5   | O      | -3.78724 | 0.598107 | -2.1599  |
| 6   | O      | 1.409558 | 0.379882 | -1.88958 |
| 7   | O      | 2.375262 | -0.534   | -3.6747  |
| 8   | O      | 0.147041 | -0.90175 | 2.093145 |
| 9   | O      | 1.138275 | -2.00159 | 3.753234 |
| 10  | O      | 1.603653 | 1.808064 | 1.074621 |
| 11  | O      | 3.531782 | 2.799481 | 0.601466 |
| 12  | O      | -0.35423 | 2.712902 | -0.79729 |
| 13  | N      | -2.18001 | -1.47056 | 0.296885 |
| 14  | N      | 0.467386 | -2.11831 | -1.03858 |
| 15  | N      | 2.53006  | -0.67068 | 0.701416 |
| 16  | C      | -1.58556 | -2.80737 | 0.239027 |
| 17  | H      | -0.9867  | -2.93624 | 1.139517 |
| 18  | C      | -0.72503 | -2.98958 | -0.99866 |
| 19  | C      | 1.557666 | -2.74691 | -0.27073 |
| 20  | H      | 1.869911 | -3.6742  | -0.76842 |

|    |   |          |          |          |
|----|---|----------|----------|----------|
| 21 | H | 1.165125 | -3.02836 | 0.705558 |
| 22 | C | 2.78694  | -1.87029 | -0.09533 |
| 23 | H | 3.573848 | -2.485   | 0.35909  |
| 24 | H | 3.16344  | -1.56732 | -1.07002 |
| 25 | C | -2.74734 | -1.16673 | 1.60652  |
| 26 | H | -3.70822 | -1.66533 | 1.768223 |
| 27 | H | -2.04891 | -1.50181 | 2.371506 |
| 28 | C | -2.92225 | 0.339035 | 1.82543  |
| 29 | C | -3.17511 | -1.22262 | -0.75404 |
| 30 | H | -4.16085 | -1.0611  | -0.31754 |
| 31 | H | -3.27321 | -2.09233 | -1.40773 |
| 32 | C | -2.84547 | -0.02971 | -1.65276 |
| 33 | C | 0.875343 | -1.88462 | -2.43043 |
| 34 | H | -0.02645 | -1.79586 | -3.03599 |
| 35 | H | 1.455923 | -2.72439 | -2.82459 |
| 36 | C | 1.637466 | -0.57872 | -2.68747 |
| 37 | C | 2.525029 | -0.95703 | 2.134154 |
| 38 | H | 3.259668 | -1.72583 | 2.392782 |
| 39 | H | 2.808192 | -0.0517  | 2.672839 |
| 40 | C | 1.163895 | -1.34258 | 2.712351 |
| 41 | C | 3.434036 | 0.430385 | 0.390367 |
| 42 | H | 3.620217 | 0.446867 | -0.68206 |
| 43 | H | 4.403554 | 0.339992 | 0.892837 |
| 44 | C | 2.8177   | 1.790873 | 0.728841 |
| 45 | O | -3.10946 | 2.96647  | -0.61174 |
| 46 | H | -1.27308 | 3.027949 | -0.8315  |
| 47 | H | 0.237549 | 3.431406 | -0.50797 |
| 48 | H | -3.39466 | 2.330394 | -1.28527 |
| 49 | H | -2.89796 | 2.396327 | 0.149965 |
| 50 | H | -2.35501 | -3.59039 | 0.240393 |
| 51 | H | -0.43226 | -4.04272 | -1.07744 |
| 52 | H | -1.32418 | -2.76747 | -1.87906 |
| 53 | O | 1.555627 | 4.623087 | -0.11077 |
| 54 | H | 1.906403 | 5.063679 | -0.88467 |
| 55 | H | 2.271613 | 4.029761 | 0.199798 |

**Table S9.** Optimized Cartesian coordinates (Å) of the [Eu(DTPA)(H<sub>2</sub>O)]<sup>2-</sup>·2H<sub>2</sub>O system obtained with DFT calculations (0 Imaginary Frequencies).

| Tag | Symbol | X        | Y        | Z        |
|-----|--------|----------|----------|----------|
| 1   | Eu     | -0.04555 | 0.317999 | 0.025906 |
| 2   | O      | -2.098   | 1.099382 | 1.171249 |
| 3   | O      | -3.73668 | 0.741271 | 2.636686 |
| 4   | O      | -1.60543 | 0.220455 | -1.81918 |
| 5   | O      | -3.76893 | 0.587138 | -2.18258 |
| 6   | O      | 1.407423 | 0.381668 | -1.8804  |
| 7   | O      | 2.371011 | -0.52308 | -3.67118 |
| 8   | O      | 0.142745 | -0.89305 | 2.077773 |
| 9   | O      | 1.119351 | -1.99026 | 3.747929 |

|    |   |          |          |          |
|----|---|----------|----------|----------|
| 10 | O | 1.58787  | 1.799075 | 1.063221 |
| 11 | O | 3.515991 | 2.800234 | 0.611873 |
| 12 | O | -0.35123 | 2.690378 | -0.80274 |
| 13 | N | -2.17565 | -1.46693 | 0.299859 |
| 14 | N | 0.466543 | -2.11566 | -1.03806 |
| 15 | N | 2.528392 | -0.67238 | 0.698966 |
| 16 | C | -1.58501 | -2.80507 | 0.239967 |
| 17 | H | -0.98543 | -2.93683 | 1.139482 |
| 18 | C | -0.72633 | -2.98643 | -0.99901 |
| 19 | C | 1.557166 | -2.74702 | -0.27278 |
| 20 | H | 1.86765  | -3.67373 | -0.77248 |
| 21 | H | 1.165708 | -3.02956 | 0.703639 |
| 22 | C | 2.786934 | -1.87121 | -0.09753 |
| 23 | H | 3.573565 | -2.48612 | 0.35712  |
| 24 | H | 3.163699 | -1.56795 | -1.07204 |
| 25 | C | -2.73897 | -1.16008 | 1.610254 |
| 26 | H | -3.70605 | -1.64685 | 1.770831 |
| 27 | H | -2.04527 | -1.50554 | 2.374545 |
| 28 | C | -2.89476 | 0.346998 | 1.832957 |
| 29 | C | -3.1715  | -1.21581 | -0.74917 |
| 30 | H | -4.15329 | -1.03785 | -0.3103  |
| 31 | H | -3.28415 | -2.08983 | -1.39494 |
| 32 | C | -2.83228 | -0.03434 | -1.65855 |
| 33 | C | 0.874109 | -1.88014 | -2.42986 |
| 34 | H | -0.02762 | -1.79127 | -3.0354  |
| 35 | H | 1.455687 | -2.71869 | -2.82499 |
| 36 | C | 1.63474  | -0.57301 | -2.68315 |
| 37 | C | 2.519175 | -0.9588  | 2.131357 |
| 38 | H | 3.248154 | -1.73234 | 2.391724 |
| 39 | H | 2.806875 | -0.05566 | 2.671351 |
| 40 | C | 1.153987 | -1.3356  | 2.704586 |
| 41 | C | 3.429185 | 0.431364 | 0.390402 |
| 42 | H | 3.617985 | 0.449214 | -0.68153 |
| 43 | H | 4.397609 | 0.345069 | 0.895603 |
| 44 | C | 2.805037 | 1.788112 | 0.728292 |
| 45 | O | -3.10732 | 2.95357  | -0.6176  |
| 46 | H | -1.26996 | 3.004929 | -0.8402  |
| 47 | H | 0.236238 | 3.409443 | -0.50619 |
| 48 | H | -3.39172 | 2.317452 | -1.29122 |
| 49 | H | -2.88929 | 2.384772 | 0.14316  |
| 50 | H | -2.35625 | -3.58631 | 0.240723 |
| 51 | H | -0.43423 | -4.03951 | -1.08019 |
| 52 | H | -1.32629 | -2.76192 | -1.87827 |
| 53 | O | 1.537962 | 4.618038 | -0.10067 |
| 54 | H | 1.888051 | 5.062254 | -0.8728  |
| 55 | H | 2.256377 | 4.02771  | 0.210253 |

**Table S10.** Optimized Cartesian coordinates (Å) of the [Gd(DTPA)(H<sub>2</sub>O)]<sup>2-</sup> · 2H<sub>2</sub>O system obtained with DFT calculations (0 Imaginary Frequencies).

| Tag | Symbol | X        | Y        | Z        |
|-----|--------|----------|----------|----------|
| 1   | Gd     | -0.04519 | 0.31545  | 0.027828 |
| 2   | O      | -2.08936 | 1.09638  | 1.167939 |
| 3   | O      | -3.71485 | 0.745956 | 2.649753 |
| 4   | O      | -1.59016 | 0.214838 | -1.81209 |
| 5   | O      | -3.74907 | 0.57436  | -2.20672 |
| 6   | O      | 1.404234 | 0.38938  | -1.8645  |
| 7   | O      | 2.370342 | -0.50492 | -3.65895 |
| 8   | O      | 0.141408 | -0.88336 | 2.069528 |
| 9   | O      | 1.10775  | -1.98304 | 3.743712 |
| 10  | O      | 1.584372 | 1.793737 | 1.049091 |
| 11  | O      | 3.512069 | 2.797797 | 0.604231 |
| 12  | O      | -0.35249 | 2.675462 | -0.80284 |
| 13  | N      | -2.17365 | -1.46583 | 0.303602 |
| 14  | N      | 0.464681 | -2.11005 | -1.03508 |
| 15  | N      | 2.529184 | -0.67486 | 0.697423 |
| 16  | C      | -1.58564 | -2.80431 | 0.23955  |
| 17  | H      | -0.98568 | -2.94015 | 1.138213 |
| 18  | C      | -0.72809 | -2.98098 | -1.00054 |
| 19  | C      | 1.554354 | -2.74662 | -0.2729  |
| 20  | H      | 1.861467 | -3.67302 | -0.77524 |
| 21  | H      | 1.163431 | -3.03027 | 0.703439 |
| 22  | C      | 2.786252 | -1.87436 | -0.09759 |
| 23  | H      | 3.571178 | -2.49097 | 0.357836 |
| 24  | H      | 3.164215 | -1.57274 | -1.0722  |
| 25  | C      | -2.73482 | -1.15978 | 1.614591 |
| 26  | H      | -3.70465 | -1.64134 | 1.774658 |
| 27  | H      | -2.04327 | -1.51042 | 2.378291 |
| 28  | C      | -2.88203 | 0.347634 | 1.838496 |
| 29  | C      | -3.16896 | -1.20972 | -0.74424 |
| 30  | H      | -4.14658 | -1.01395 | -0.3037  |
| 31  | H      | -3.29733 | -2.08744 | -1.38227 |
| 32  | C      | -2.81838 | -0.03987 | -1.66377 |
| 33  | C      | 0.872791 | -1.86915 | -2.42584 |
| 34  | H      | -0.02877 | -1.77744 | -3.03115 |
| 35  | H      | 1.454756 | -2.70591 | -2.82412 |
| 36  | C      | 1.632888 | -0.56073 | -2.67194 |
| 37  | C      | 2.516889 | -0.95958 | 2.129725 |
| 38  | H      | 3.241764 | -1.73618 | 2.392568 |
| 39  | H      | 2.807475 | -0.05719 | 2.669509 |
| 40  | C      | 1.148813 | -1.32967 | 2.699825 |
| 41  | C      | 3.430263 | 0.427941 | 0.388347 |
| 42  | H      | 3.623682 | 0.442412 | -0.68276 |
| 43  | H      | 4.396678 | 0.344655 | 0.897958 |
| 44  | C      | 2.8027   | 1.784272 | 0.719263 |
| 45  | O      | -3.11045 | 2.941116 | -0.62423 |

|    |   |          |          |          |
|----|---|----------|----------|----------|
| 46 | H | -1.27114 | 2.989484 | -0.8427  |
| 47 | H | 0.233083 | 3.394954 | -0.50388 |
| 48 | H | -3.39036 | 2.305094 | -1.2996  |
| 49 | H | -2.8898  | 2.372741 | 0.136108 |
| 50 | H | -2.35786 | -3.58465 | 0.237855 |
| 51 | H | -0.43599 | -4.03362 | -1.08692 |
| 52 | H | -1.32846 | -2.75213 | -1.8784  |
| 53 | O | 1.528891 | 4.613301 | -0.09802 |
| 54 | H | 1.876025 | 5.061819 | -0.86898 |
| 55 | H | 2.249452 | 4.023169 | 0.208521 |

**Table S11.** Optimized Cartesian coordinates (Å) of the  $[\text{Tb}(\text{DTPA})(\text{H}_2\text{O})]^{2-} \cdot 2\text{H}_2\text{O}$  system obtained with DFT calculations (0 Imaginary Frequencies).

| Tag | Symbol | X        | Y        | Z        |
|-----|--------|----------|----------|----------|
| 1   | Tb     | -0.03854 | 0.298532 | 0.008302 |
| 2   | O      | -2.0306  | 1.108872 | 1.164815 |
| 3   | O      | -3.65849 | 0.789526 | 2.65042  |
| 4   | O      | -1.57912 | 0.208377 | -1.81731 |
| 5   | O      | -3.73611 | 0.56587  | -2.22371 |
| 6   | O      | 1.403128 | 0.375097 | -1.87188 |
| 7   | O      | 2.351057 | -0.51706 | -3.67714 |
| 8   | O      | 0.137841 | -0.88349 | 2.047064 |
| 9   | O      | 1.091676 | -1.96647 | 3.739092 |
| 10  | O      | 1.550572 | 1.778065 | 1.045711 |
| 11  | O      | 3.477494 | 2.803634 | 0.6488   |
| 12  | O      | -0.33882 | 2.649983 | -0.82093 |
| 13  | N      | -2.16626 | -1.45771 | 0.303544 |
| 14  | N      | 0.46435  | -2.11744 | -1.03701 |
| 15  | N      | 2.525672 | -0.67531 | 0.690477 |
| 16  | C      | -1.58364 | -2.79939 | 0.248776 |
| 17  | H      | -0.98258 | -2.93051 | 1.14725  |
| 18  | C      | -0.72824 | -2.98861 | -0.99122 |
| 19  | C      | 1.560054 | -2.74933 | -0.27904 |
| 20  | H      | 1.86894  | -3.67447 | -0.78236 |
| 21  | H      | 1.174014 | -3.03431 | 0.698902 |
| 22  | C      | 2.788693 | -1.87093 | -0.10771 |
| 23  | H      | 3.578213 | -2.48413 | 0.344334 |
| 24  | H      | 3.161982 | -1.56506 | -1.08274 |
| 25  | C      | -2.7222  | -1.13606 | 1.61324  |
| 26  | H      | -3.70261 | -1.59541 | 1.7729   |
| 27  | H      | -2.0404  | -1.50023 | 2.378915 |
| 28  | C      | -2.83641 | 0.374423 | 1.836977 |
| 29  | C      | -3.16244 | -1.20597 | -0.74416 |
| 30  | H      | -4.13869 | -1.00315 | -0.3038  |
| 31  | H      | -3.29498 | -2.0877  | -1.37573 |
| 32  | C      | -2.8081  | -0.0446  | -1.67227 |
| 33  | C      | 0.864491 | -1.88163 | -2.43101 |
| 34  | H      | -0.04017 | -1.7918  | -3.03186 |

|    |   |          |          |          |
|----|---|----------|----------|----------|
| 35 | H | 1.44468  | -2.71943 | -2.82959 |
| 36 | C | 1.623082 | -0.57379 | -2.68337 |
| 37 | C | 2.51162  | -0.96428 | 2.121708 |
| 38 | H | 3.229159 | -1.74836 | 2.382096 |
| 39 | H | 2.811046 | -0.06718 | 2.665476 |
| 40 | C | 1.140107 | -1.32424 | 2.688446 |
| 41 | C | 3.415802 | 0.437194 | 0.387281 |
| 42 | H | 3.603716 | 0.463302 | -0.6847  |
| 43 | H | 4.384864 | 0.359476 | 0.892474 |
| 44 | C | 2.774224 | 1.783205 | 0.734122 |
| 45 | O | -3.09804 | 2.931148 | -0.63409 |
| 46 | H | -1.25863 | 2.959475 | -0.86461 |
| 47 | H | 0.233411 | 3.368795 | -0.49584 |
| 48 | H | -3.38334 | 2.29111  | -1.30326 |
| 49 | H | -2.86409 | 2.369529 | 0.126841 |
| 50 | H | -2.35885 | -3.57663 | 0.253594 |
| 51 | H | -0.43608 | -4.04193 | -1.06718 |
| 52 | H | -1.33021 | -2.76924 | -1.87044 |
| 53 | O | 1.493685 | 4.613932 | -0.04969 |
| 54 | H | 1.845319 | 5.076432 | -0.81029 |
| 55 | H | 2.21683  | 4.027554 | 0.258049 |

**Table S12.** Optimized Cartesian coordinates (Å) of the  $[\text{Dy}(\text{DTPA})(\text{H}_2\text{O})]^{2-} \cdot 2\text{H}_2\text{O}$  system obtained with DFT calculations (0 Imaginary Frequencies).

| Tag | Symbol | X        | Y        | Z        |
|-----|--------|----------|----------|----------|
| 1   | Dy     | -0.03515 | 0.290446 | 0.000285 |
| 2   | O      | -2.0006  | 1.112578 | 1.157916 |
| 3   | O      | -3.6198  | 0.812718 | 2.656766 |
| 4   | O      | -1.56649 | 0.203632 | -1.8152  |
| 5   | O      | -3.72019 | 0.554454 | -2.24307 |
| 6   | O      | 1.4004   | 0.371439 | -1.86834 |
| 7   | O      | 2.337881 | -0.51421 | -3.68217 |
| 8   | O      | 0.13615  | -0.87784 | 2.032546 |
| 9   | O      | 1.079    | -1.95372 | 3.735039 |
| 10  | O      | 1.532804 | 1.767262 | 1.036678 |
| 11  | O      | 3.458913 | 2.804801 | 0.668955 |
| 12  | O      | -0.33151 | 2.632433 | -0.83173 |
| 13  | N      | -2.16173 | -1.45379 | 0.305775 |
| 14  | N      | 0.462981 | -2.11831 | -1.03603 |
| 15  | N      | 2.524885 | -0.67679 | 0.686038 |
| 16  | C      | -1.58289 | -2.79701 | 0.253916 |
| 17  | H      | -0.98107 | -2.92756 | 1.151896 |
| 18  | C      | -0.72913 | -2.99012 | -0.98652 |
| 19  | C      | 1.561421 | -2.75025 | -0.28186 |
| 20  | H      | 1.86917  | -3.67486 | -0.78672 |
| 21  | H      | 1.178416 | -3.03599 | 0.697102 |
| 22  | C      | 2.789656 | -1.87067 | -0.11329 |

|    |   |          |          |          |
|----|---|----------|----------|----------|
| 23 | H | 3.580888 | -2.48306 | 0.33691  |
| 24 | H | 3.160593 | -1.56346 | -1.08877 |
| 25 | C | -2.71426 | -1.12451 | 1.614804 |
| 26 | H | -3.70079 | -1.57059 | 1.77416  |
| 27 | H | -2.03851 | -1.49693 | 2.38159  |
| 28 | C | -2.80887 | 0.387345 | 1.837576 |
| 29 | C | -3.15757 | -1.20176 | -0.74167 |
| 30 | H | -4.13126 | -0.9874  | -0.30114 |
| 31 | H | -3.29921 | -2.08688 | -1.36659 |
| 32 | C | -2.79625 | -0.04978 | -1.67823 |
| 33 | C | 0.859185 | -1.88303 | -2.43131 |
| 34 | H | -0.0469  | -1.79429 | -3.03006 |
| 35 | H | 1.43945  | -2.72024 | -2.83094 |
| 36 | C | 1.615678 | -0.57449 | -2.68439 |
| 37 | C | 2.508632 | -0.96743 | 2.116604 |
| 38 | H | 3.219685 | -1.75755 | 2.376398 |
| 39 | H | 2.81513  | -0.07399 | 2.6625   |
| 40 | C | 1.134018 | -1.31797 | 2.680703 |
| 41 | C | 3.40973  | 0.44001  | 0.385592 |
| 42 | H | 3.596872 | 0.470469 | -0.68644 |
| 43 | H | 4.379242 | 0.366313 | 0.890445 |
| 44 | C | 2.759659 | 1.780479 | 0.737415 |
| 45 | O | -3.0934  | 2.921071 | -0.64472 |
| 46 | H | -1.25189 | 2.938993 | -0.87944 |
| 47 | H | 0.231976 | 3.350749 | -0.49097 |
| 48 | H | -3.3794  | 2.279409 | -1.31184 |
| 49 | H | -2.85238 | 2.362489 | 0.116022 |
| 50 | H | -2.35986 | -3.57247 | 0.260884 |
| 51 | H | -0.43656 | -4.04346 | -1.05966 |
| 52 | H | -1.33227 | -2.7738  | -1.86569 |
| 53 | O | 1.471768 | 4.612156 | -0.02113 |
| 54 | H | 1.824597 | 5.084988 | -0.77479 |
| 55 | H | 2.197232 | 4.027704 | 0.284856 |

**Table S13.** Optimized Cartesian coordinates (Å) of the [Ho(DTPA)(H<sub>2</sub>O)]<sup>2-</sup> · 2H<sub>2</sub>O system obtained with DFT calculations (0 Imaginary Frequencies).

| Tag | Symbol | X        | Y        | Z        |
|-----|--------|----------|----------|----------|
| 1   | Ho     | -0.0326  | 0.284228 | -0.0071  |
| 2   | O      | -1.97451 | 1.115044 | 1.151016 |
| 3   | O      | -3.581   | 0.832214 | 2.666462 |
| 4   | O      | -1.5543  | 0.198298 | -1.81325 |
| 5   | O      | -3.70452 | 0.54271  | -2.26219 |
| 6   | O      | 1.397454 | 0.369516 | -1.86288 |
| 7   | O      | 2.327922 | -0.5087  | -3.68379 |
| 8   | O      | 0.134847 | -0.86914 | 2.017958 |
| 9   | O      | 1.064585 | -1.93867 | 3.731395 |
| 10  | O      | 1.517847 | 1.756656 | 1.026494 |
| 11  | O      | 3.442794 | 2.804746 | 0.684926 |

|    |   |          |          |          |
|----|---|----------|----------|----------|
| 12 | O | -0.32718 | 2.617475 | -0.84327 |
| 13 | N | -2.15773 | -1.45021 | 0.308114 |
| 14 | N | 0.461901 | -2.11805 | -1.03493 |
| 15 | N | 2.525484 | -0.6791  | 0.682392 |
| 16 | C | -1.58228 | -2.79468 | 0.257735 |
| 17 | H | -0.97981 | -2.92567 | 1.155153 |
| 18 | C | -0.73008 | -2.99002 | -0.98333 |
| 19 | C | 1.562116 | -2.75098 | -0.284   |
| 20 | H | 1.867942 | -3.67545 | -0.79015 |
| 21 | H | 1.181521 | -3.03692 | 0.695877 |
| 22 | C | 2.790809 | -1.87151 | -0.1179  |
| 23 | H | 3.582986 | -2.48401 | 0.330569 |
| 24 | H | 3.159901 | -1.56342 | -1.09381 |
| 25 | C | -2.70662 | -1.1148  | 1.616869 |
| 26 | H | -3.69874 | -1.5484  | 1.775874 |
| 27 | H | -2.03659 | -1.49547 | 2.38435  |
| 28 | C | -2.78271 | 0.397954 | 1.83969  |
| 29 | C | -3.15345 | -1.19728 | -0.73873 |
| 30 | H | -4.12404 | -0.97045 | -0.29768 |
| 31 | H | -3.30529 | -2.08569 | -1.35665 |
| 32 | C | -2.7848  | -0.05523 | -1.68402 |
| 33 | C | 0.855575 | -1.88271 | -2.43098 |
| 34 | H | -0.05126 | -1.79508 | -3.02862 |
| 35 | H | 1.436566 | -2.71903 | -2.83134 |
| 36 | C | 1.609903 | -0.5732  | -2.68328 |
| 37 | C | 2.505904 | -0.97102 | 2.112255 |
| 38 | H | 3.208904 | -1.7683  | 2.371986 |
| 39 | H | 2.820745 | -0.08173 | 2.660245 |
| 40 | C | 1.127503 | -1.30982 | 2.673334 |
| 41 | C | 3.405687 | 0.441292 | 0.384448 |
| 42 | H | 3.593421 | 0.474805 | -0.68741 |
| 43 | H | 4.375066 | 0.371839 | 0.890121 |
| 44 | C | 2.747554 | 1.776973 | 0.738874 |
| 45 | O | -3.09184 | 2.910339 | -0.65357 |
| 46 | H | -1.24813 | 2.921383 | -0.89271 |
| 47 | H | 0.228841 | 3.334829 | -0.48886 |
| 48 | H | -3.37765 | 2.267688 | -1.31962 |
| 49 | H | -2.84374 | 2.35389  | 0.10627  |
| 50 | H | -2.36078 | -3.56859 | 0.265956 |
| 51 | H | -0.43753 | -4.04337 | -1.05549 |
| 52 | H | -1.33425 | -2.77479 | -1.86207 |
| 53 | O | 1.451439 | 4.609277 | 0.002971 |
| 54 | H | 1.805358 | 5.091602 | -0.74414 |
| 55 | H | 2.178934 | 4.026417 | 0.307099 |

**Table S14.** Optimized Cartesian coordinates (Å) of the [Er(DTPA)(H<sub>2</sub>O)]<sup>2-</sup> · 2H<sub>2</sub>O system obtained with DFT calculations (0 Imaginary Frequencies).

| Tag | Symbol | X        | Y        | Z        |
|-----|--------|----------|----------|----------|
| 1   | Er     | -0.0303  | 0.278706 | -0.01441 |
| 2   | O      | -1.94976 | 1.117573 | 1.144278 |
| 3   | O      | -3.5442  | 0.851072 | 2.675051 |
| 4   | O      | -1.54201 | 0.192199 | -1.81201 |
| 5   | O      | -3.68864 | 0.531378 | -2.28091 |
| 6   | O      | 1.394338 | 0.367941 | -1.85687 |
| 7   | O      | 2.318818 | -0.50254 | -3.68445 |
| 8   | O      | 0.134353 | -0.85983 | 2.00307  |
| 9   | O      | 1.049935 | -1.92229 | 3.72829  |
| 10  | O      | 1.502857 | 1.745574 | 1.01831  |
| 11  | O      | 3.425775 | 2.804603 | 0.700799 |
| 12  | O      | -0.32398 | 2.603717 | -0.85429 |
| 13  | N      | -2.154   | -1.4465  | 0.310386 |
| 14  | N      | 0.461111 | -2.1177  | -1.03387 |
| 15  | N      | 2.527019 | -0.68188 | 0.679195 |
| 16  | C      | -1.5816  | -2.79204 | 0.261546 |
| 17  | H      | -0.9786  | -2.92336 | 1.158502 |
| 18  | C      | -0.73075 | -2.98977 | -0.97998 |
| 19  | C      | 1.563261 | -2.75161 | -0.28646 |
| 20  | H      | 1.867194 | -3.67589 | -0.79406 |
| 21  | H      | 1.185242 | -3.03799 | 0.694339 |
| 22  | C      | 2.792527 | -1.87236 | -0.12273 |
| 23  | H      | 3.585711 | -2.48537 | 0.323428 |
| 24  | H      | 3.159557 | -1.56295 | -1.09901 |
| 25  | C      | -2.69943 | -1.10515 | 1.618799 |
| 26  | H      | -3.69674 | -1.52683 | 1.777464 |
| 27  | H      | -2.03501 | -1.49354 | 2.387056 |
| 28  | C      | -2.75788 | 0.408311 | 1.841379 |
| 29  | C      | -3.14942 | -1.19273 | -0.73596 |
| 30  | H      | -4.11687 | -0.95347 | -0.29461 |
| 31  | H      | -3.31135 | -2.08429 | -1.3469  |
| 32  | C      | -2.7733  | -0.06077 | -1.68997 |
| 33  | C      | 0.851943 | -1.88188 | -2.43061 |
| 34  | H      | -0.05579 | -1.79484 | -3.02688 |
| 35  | H      | 1.433423 | -2.71723 | -2.83224 |
| 36  | C      | 1.604294 | -0.57138 | -2.68173 |
| 37  | C      | 2.503807 | -0.9758  | 2.108085 |
| 38  | H      | 3.197461 | -1.78139 | 2.367257 |
| 39  | H      | 2.828319 | -0.09162 | 2.65879  |
| 40  | C      | 1.121279 | -1.30131 | 2.666007 |
| 41  | C      | 3.401785 | 0.442662 | 0.384078 |
| 42  | H      | 3.590287 | 0.479538 | -0.68755 |
| 43  | H      | 4.371024 | 0.378073 | 0.890671 |
| 44  | C      | 2.734971 | 1.773229 | 0.741338 |
| 45  | O      | -3.09127 | 2.899783 | -0.66154 |

|    |   |          |          |          |
|----|---|----------|----------|----------|
| 46 | H | -1.24564 | 2.904891 | -0.90381 |
| 47 | H | 0.225422 | 3.319956 | -0.48771 |
| 48 | H | -3.37605 | 2.255308 | -1.32611 |
| 49 | H | -2.83644 | 2.346281 | 0.098064 |
| 50 | H | -2.3615  | -3.56455 | 0.270978 |
| 51 | H | -0.43824 | -4.0432  | -1.05071 |
| 52 | H | -1.33584 | -2.77614 | -1.8585  |
| 53 | O | 1.432267 | 4.605134 | 0.023871 |
| 54 | H | 1.787116 | 5.096351 | -0.71697 |
| 55 | H | 2.161564 | 4.023593 | 0.326511 |

**Table S15.** Optimized Cartesian coordinates (Å) of the  $[\text{Tm}(\text{DTPA})(\text{H}_2\text{O})]^{2-} \cdot 2\text{H}_2\text{O}$  system obtained with DFT calculations (0 Imaginary Frequencies).

| Tag | Symbol | X        | Y        | Z        |
|-----|--------|----------|----------|----------|
| 1   | Tm     | -0.02911 | 0.273068 | -0.02158 |
| 2   | O      | -1.92594 | 1.120371 | 1.137711 |
| 3   | O      | -3.51029 | 0.870075 | 2.681293 |
| 4   | O      | -1.53124 | 0.186559 | -1.81137 |
| 5   | O      | -3.67459 | 0.520106 | -2.29822 |
| 6   | O      | 1.392393 | 0.366828 | -1.85199 |
| 7   | O      | 2.311425 | -0.49784 | -3.68498 |
| 8   | O      | 0.134855 | -0.85352 | 1.989372 |
| 9   | O      | 1.037498 | -1.90706 | 3.726565 |
| 10  | O      | 1.487288 | 1.733913 | 1.010623 |
| 11  | O      | 3.407466 | 2.804314 | 0.716876 |
| 12  | O      | -0.32086 | 2.590576 | -0.86647 |
| 13  | N      | -2.15028 | -1.44242 | 0.312689 |
| 14  | N      | 0.460404 | -2.11673 | -1.03274 |
| 15  | N      | 2.529709 | -0.68532 | 0.676975 |
| 16  | C      | -1.5808  | -2.78904 | 0.265502 |
| 17  | H      | -0.97729 | -2.92045 | 1.162026 |
| 18  | C      | -0.73127 | -2.98908 | -0.97651 |
| 19  | C      | 1.564642 | -2.75193 | -0.28925 |
| 20  | H      | 1.866423 | -3.6758  | -0.79877 |
| 21  | H      | 1.189248 | -3.03909 | 0.692361 |
| 22  | C      | 2.794739 | -1.87323 | -0.12759 |
| 23  | H      | 3.588843 | -2.4874  | 0.315525 |
| 24  | H      | 3.159483 | -1.56184 | -1.1041  |
| 25  | C      | -2.69225 | -1.09517 | 1.620826 |
| 26  | H      | -3.69406 | -1.50595 | 1.779531 |
| 27  | H      | -2.03273 | -1.4901  | 2.389773 |
| 28  | C      | -2.73461 | 0.418893 | 1.842285 |
| 29  | C      | -3.14578 | -1.18824 | -0.73305 |
| 30  | H      | -4.11004 | -0.93729 | -0.29127 |
| 31  | H      | -3.31726 | -2.08284 | -1.33699 |
| 32  | C      | -2.76314 | -0.0661  | -1.6956  |
| 33  | C      | 0.84799  | -1.88047 | -2.43038 |
| 34  | H      | -0.06096 | -1.79264 | -3.02458 |

|    |   |          |          |          |
|----|---|----------|----------|----------|
| 35 | H | 1.428656 | -2.71549 | -2.83375 |
| 36 | C | 1.599715 | -0.56977 | -2.68047 |
| 37 | C | 2.502871 | -0.98195 | 2.104649 |
| 38 | H | 3.187088 | -1.79596 | 2.362667 |
| 39 | H | 2.837254 | -0.10339 | 2.658514 |
| 40 | C | 1.116481 | -1.2946  | 2.659767 |
| 41 | C | 3.398062 | 0.444037 | 0.38483  |
| 42 | H | 3.587518 | 0.484304 | -0.68652 |
| 43 | H | 4.367079 | 0.385227 | 0.892561 |
| 44 | C | 2.721674 | 1.769219 | 0.744248 |
| 45 | O | -3.09057 | 2.889963 | -0.6694  |
| 46 | H | -1.24301 | 2.889512 | -0.91637 |
| 47 | H | 0.222181 | 3.305477 | -0.48825 |
| 48 | H | -3.37481 | 2.244301 | -1.33284 |
| 49 | H | -2.82855 | 2.338769 | 0.089279 |
| 50 | H | -2.36208 | -3.56014 | 0.276169 |
| 51 | H | -0.43863 | -4.0425  | -1.04583 |
| 52 | H | -1.33735 | -2.77714 | -1.85476 |
| 53 | O | 1.412523 | 4.601148 | 0.043532 |
| 54 | H | 1.76871  | 5.100696 | -0.69105 |
| 55 | H | 2.143339 | 4.020868 | 0.345177 |

**Table S16.** Optimized Cartesian coordinates (Å) of the  $[\text{Yb}(\text{DTPA})(\text{H}_2\text{O})]^{2-} \cdot 2\text{H}_2\text{O}$  system obtained with DFT calculations (0 Imaginary Frequencies).

| Tag | Symbol | X        | Y        | Z        |
|-----|--------|----------|----------|----------|
| 1   | Yb     | -0.0293  | 0.270942 | -0.02674 |
| 2   | O      | -1.90969 | 1.121426 | 1.130964 |
| 3   | O      | -3.48169 | 0.883239 | 2.688787 |
| 4   | O      | -1.52124 | 0.182135 | -1.80842 |
| 5   | O      | -3.66093 | 0.508311 | -2.3151  |
| 6   | O      | 1.388954 | 0.368037 | -1.84291 |
| 7   | O      | 2.306485 | -0.48826 | -3.68043 |
| 8   | O      | 0.13558  | -0.8446  | 1.973816 |
| 9   | O      | 1.022921 | -1.88755 | 3.724863 |
| 10  | O      | 1.477509 | 1.723937 | 0.998712 |
| 11  | O      | 3.395382 | 2.802619 | 0.722867 |
| 12  | O      | -0.32108 | 2.580624 | -0.87185 |
| 13  | N      | -2.14794 | -1.43989 | 0.314963 |
| 14  | N      | 0.459712 | -2.1147  | -1.03101 |
| 15  | N      | 2.534775 | -0.68958 | 0.675286 |
| 16  | C      | -1.58031 | -2.78695 | 0.268145 |
| 17  | H      | -0.97629 | -2.91893 | 1.164205 |
| 18  | C      | -0.73173 | -2.98735 | -0.97437 |
| 19  | C      | 1.564959 | -2.75219 | -0.29088 |
| 20  | H      | 1.863727 | -3.67612 | -0.80204 |
| 21  | H      | 1.191501 | -3.03962 | 0.691412 |
| 22  | C      | 2.797088 | -1.87584 | -0.13105 |
| 23  | H      | 3.590907 | -2.49248 | 0.309452 |

|    |   |          |          |          |
|----|---|----------|----------|----------|
| 24 | H | 3.160302 | -1.56365 | -1.10792 |
| 25 | C | -2.68664 | -1.08855 | 1.62302  |
| 26 | H | -3.69189 | -1.49072 | 1.782132 |
| 27 | H | -2.03094 | -1.48882 | 2.392316 |
| 28 | C | -2.71644 | 0.425795 | 1.843651 |
| 29 | C | -3.14306 | -1.18455 | -0.73026 |
| 30 | H | -4.10419 | -0.92212 | -0.28833 |
| 31 | H | -3.32402 | -2.08159 | -1.32791 |
| 32 | C | -2.75365 | -0.07144 | -1.7002  |
| 33 | C | 0.845643 | -1.8767  | -2.42875 |
| 34 | H | -0.06372 | -1.78844 | -3.02218 |
| 35 | H | 1.426865 | -2.71048 | -2.83383 |
| 36 | C | 1.595924 | -0.56499 | -2.67548 |
| 37 | C | 2.502262 | -0.98728 | 2.101801 |
| 38 | H | 3.175523 | -1.81026 | 2.360456 |
| 39 | H | 2.846863 | -0.11426 | 2.658261 |
| 40 | C | 1.111148 | -1.28499 | 2.653114 |
| 41 | C | 3.398114 | 0.442894 | 0.384621 |
| 42 | H | 3.590149 | 0.483701 | -0.68628 |
| 43 | H | 4.366234 | 0.390091 | 0.894834 |
| 44 | C | 2.713815 | 1.764563 | 0.741742 |
| 45 | O | -3.09311 | 2.880426 | -0.67646 |
| 46 | H | -1.2434  | 2.878232 | -0.9232  |
| 47 | H | 0.21761  | 3.293987 | -0.48482 |
| 48 | H | -3.37523 | 2.234424 | -1.34025 |
| 49 | H | -2.82565 | 2.330322 | 0.081016 |
| 50 | H | -2.36229 | -3.55736 | 0.279207 |
| 51 | H | -0.43892 | -4.04069 | -1.04382 |
| 52 | H | -1.33849 | -2.77569 | -1.85223 |
| 53 | O | 1.397464 | 4.597667 | 0.058909 |
| 54 | H | 1.752446 | 5.103424 | -0.672   |
| 55 | H | 2.130031 | 4.017547 | 0.356868 |

**Table S17.** Optimized Cartesian coordinates (Å) of the [Lu(DTPA)(H<sub>2</sub>O)]<sup>2-</sup> @2H<sub>2</sub>O system obtained with DFT calculations (0 Imaginary Frequencies).

| Tag | Symbol | X        | Y        | Z        |
|-----|--------|----------|----------|----------|
| 1   | Lu     | -0.02857 | 0.266553 | -0.03077 |
| 2   | O      | -1.89421 | 1.122585 | 1.125014 |
| 3   | O      | -3.45632 | 0.89579  | 2.694339 |
| 4   | O      | -1.511   | 0.17878  | -1.80561 |
| 5   | O      | -3.64702 | 0.497774 | -2.33124 |
| 6   | O      | 1.386651 | 0.368984 | -1.83632 |
| 7   | O      | 2.301842 | -0.48106 | -3.67786 |
| 8   | O      | 0.135942 | -0.84064 | 1.962841 |
| 9   | O      | 1.013817 | -1.87378 | 3.724204 |
| 10  | O      | 1.467712 | 1.714527 | 0.990579 |
| 11  | O      | 3.382537 | 2.801385 | 0.72699  |
| 12  | O      | -0.3201  | 2.57021  | -0.87694 |

|    |   |          |          |          |
|----|---|----------|----------|----------|
| 13 | N | -2.14478 | -1.43661 | 0.317108 |
| 14 | N | 0.458991 | -2.11273 | -1.02943 |
| 15 | N | 2.537273 | -0.69296 | 0.673566 |
| 16 | C | -1.57999 | -2.78459 | 0.27036  |
| 17 | H | -0.97565 | -2.9178  | 1.165981 |
| 18 | C | -0.73254 | -2.98535 | -0.9727  |
| 19 | C | 1.564861 | -2.75265 | -0.29214 |
| 20 | H | 1.861073 | -3.67644 | -0.80498 |
| 21 | H | 1.19301  | -3.04053 | 0.690633 |
| 22 | C | 2.798325 | -1.87794 | -0.13393 |
| 23 | H | 3.592273 | -2.49593 | 0.30464  |
| 24 | H | 3.160177 | -1.56514 | -1.11113 |
| 25 | C | -2.68098 | -1.08196 | 1.625105 |
| 26 | H | -3.6892  | -1.47664 | 1.784119 |
| 27 | H | -2.02879 | -1.48691 | 2.394777 |
| 28 | C | -2.69971 | 0.432571 | 1.8446   |
| 29 | C | -3.13976 | -1.17971 | -0.72746 |
| 30 | H | -4.0974  | -0.90564 | -0.28508 |
| 31 | H | -3.33064 | -2.07894 | -1.31879 |
| 32 | C | -2.7438  | -0.07567 | -1.70468 |
| 33 | C | 0.843975 | -1.87389 | -2.42737 |
| 34 | H | -0.06547 | -1.7862  | -3.02065 |
| 35 | H | 1.426071 | -2.70674 | -2.83301 |
| 36 | C | 1.592836 | -0.56128 | -2.67204 |
| 37 | C | 2.501611 | -0.99136 | 2.099303 |
| 38 | H | 3.167656 | -1.82021 | 2.35802  |
| 39 | H | 2.853198 | -0.12216 | 2.657416 |
| 40 | C | 1.107676 | -1.27911 | 2.648427 |
| 41 | C | 3.396396 | 0.442219 | 0.383949 |
| 42 | H | 3.590445 | 0.483586 | -0.68655 |
| 43 | H | 4.363732 | 0.394322 | 0.896189 |
| 44 | C | 2.705092 | 1.760515 | 0.739673 |
| 45 | O | -3.09467 | 2.871516 | -0.68352 |
| 46 | H | -1.24261 | 2.866157 | -0.93065 |
| 47 | H | 0.213484 | 3.282444 | -0.48113 |
| 48 | H | -3.37501 | 2.224828 | -1.3472  |
| 49 | H | -2.82239 | 2.323018 | 0.073295 |
| 50 | H | -2.36331 | -3.55364 | 0.281483 |
| 51 | H | -0.43989 | -4.03865 | -1.04269 |
| 52 | H | -1.33993 | -2.77344 | -1.85007 |
| 53 | O | 1.382582 | 4.595099 | 0.074156 |
| 54 | H | 1.735592 | 5.106312 | -0.65391 |
| 55 | H | 2.116963 | 4.014839 | 0.367748 |

**Table S18.** Optimized Cartesian coordinates (Å) of the [La(AAZTA)(H<sub>2</sub>O)<sub>2</sub>]<sup>-</sup>•4H<sub>2</sub>O system obtained with DFT calculations (0 Imaginary Frequencies).

| Tag | Symbol | X        | Y        | Z        |
|-----|--------|----------|----------|----------|
| 1   | La     | -0.46291 | 0.080846 | 0.309722 |
| 2   | O      | 0.741133 | 2.035147 | 1.455788 |
| 3   | N      | 2.036944 | -0.9392  | -0.12223 |
| 4   | C      | 2.001572 | -2.41708 | -0.15448 |
| 5   | H      | 2.794059 | -2.82764 | 0.470924 |
| 6   | H      | 2.202381 | -2.79168 | -1.15537 |
| 7   | O      | 1.733383 | 4.027343 | 1.537109 |
| 8   | N      | 0.160096 | -0.47821 | -2.34963 |
| 9   | C      | 0.679967 | -3.08172 | 0.260292 |
| 10  | N      | 1.134565 | 1.832909 | -1.25334 |
| 11  | C      | 2.507174 | -0.31472 | -1.40405 |
| 12  | C      | 2.471677 | 1.216283 | -1.29865 |
| 13  | H      | 3.024059 | 1.535831 | -0.42035 |
| 14  | H      | 3.025176 | 1.6154   | -2.15529 |
| 15  | C      | 0.581068 | 1.963386 | -2.61135 |
| 16  | H      | 1.391363 | 2.142873 | -3.32414 |
| 17  | H      | -0.06699 | 2.835067 | -2.64413 |
| 18  | O      | 0.738279 | -4.26092 | 0.608454 |
| 19  | O      | -0.37704 | -2.38894 | 0.149904 |
| 20  | C      | -0.24876 | 0.754557 | -3.03148 |
| 21  | H      | -0.18741 | 0.631448 | -4.11912 |
| 22  | H      | -1.2942  | 0.931005 | -2.7841  |
| 23  | O      | 0.801101 | -0.81979 | 2.331838 |
| 24  | C      | 1.589738 | -0.76631 | -2.55816 |
| 25  | H      | 1.946557 | -0.28768 | -3.47462 |
| 26  | H      | 1.709399 | -1.8327  | -2.72643 |
| 27  | O      | 2.741951 | -1.1752  | 3.365649 |
| 28  | C      | 2.799568 | -0.53987 | 1.071729 |
| 29  | H      | 2.911265 | 0.540508 | 1.112193 |
| 30  | H      | 3.796245 | -0.98406 | 1.089476 |
| 31  | O      | -1.86141 | 2.303192 | -0.21863 |
| 32  | C      | 2.074673 | -0.89466 | 2.37554  |
| 33  | C      | 1.223868 | 3.140721 | -0.60158 |
| 34  | H      | 0.316513 | 3.699243 | -0.82987 |
| 35  | H      | 2.074896 | 3.723044 | -0.96626 |
| 36  | O      | -2.36656 | -0.67937 | -1.30917 |
| 37  | C      | 1.266418 | 3.069628 | 0.925172 |
| 38  | O      | -2.97212 | -2.23518 | -2.78111 |
| 39  | C      | 3.946841 | -0.71436 | -1.74308 |
| 40  | H      | 4.647094 | -0.29582 | -1.02081 |
| 41  | H      | 4.069206 | -1.79638 | -1.74757 |
| 42  | C      | -0.69665 | -1.58021 | -2.7871  |
| 43  | H      | -0.29787 | -2.5139  | -2.39511 |
| 44  | H      | -0.72688 | -1.66128 | -3.87862 |
| 45  | C      | -2.13619 | -1.50289 | -2.27164 |

|    |   |          |          |          |
|----|---|----------|----------|----------|
| 46 | O | -2.40093 | 0.089858 | 2.424145 |
| 47 | H | 4.223886 | -0.3429  | -2.72885 |
| 48 | H | -2.03727 | -0.48316 | 3.129661 |
| 49 | H | -3.12051 | -0.40332 | 1.98812  |
| 50 | H | -2.02254 | 2.730876 | 0.639569 |
| 51 | H | -2.71878 | 2.17829  | -0.66825 |
| 52 | O | -1.78226 | 2.937235 | 2.520487 |
| 53 | H | -2.16549 | 2.069378 | 2.711548 |
| 54 | H | -0.83518 | 2.750432 | 2.429913 |
| 55 | O | -4.0566  | 1.458725 | -1.58695 |
| 56 | H | -4.15631 | 1.750086 | -2.49356 |
| 57 | H | -3.59896 | 0.59959  | -1.6293  |
| 58 | O | -4.13632 | -1.27094 | 0.742085 |
| 59 | O | -0.98751 | -1.37435 | 4.226547 |
| 60 | H | -4.19469 | -2.21197 | 0.90904  |
| 61 | H | -3.60842 | -1.1822  | -0.07348 |
| 62 | H | -1.16289 | -2.31508 | 4.249077 |
| 63 | H | -0.21405 | -1.25883 | 3.629227 |

**Table S19.** Optimized Cartesian coordinates (Å) of the  $[\text{Ce}(\text{AAZTA})(\text{H}_2\text{O})_2]^- \cdot 4\text{H}_2\text{O}$  system obtained with DFT calculations (0 Imaginary Frequencies).

| Tag | Symbol | X        | Y        | Z        |
|-----|--------|----------|----------|----------|
| 1   | Ce     | -0.41675 | 0.119229 | 0.310712 |
| 2   | O      | 0.746344 | 2.066661 | 1.447876 |
| 3   | N      | 2.045455 | -0.92092 | -0.11199 |
| 4   | C      | 1.990591 | -2.39846 | -0.12541 |
| 5   | H      | 2.790357 | -2.81256 | 0.488278 |
| 6   | H      | 2.16413  | -2.78728 | -1.12595 |
| 7   | O      | 1.748368 | 4.054273 | 1.518876 |
| 8   | N      | 0.154393 | -0.47036 | -2.3244  |
| 9   | C      | 0.666919 | -3.03628 | 0.325338 |
| 10  | N      | 1.153048 | 1.842979 | -1.26172 |
| 11  | C      | 2.510878 | -0.31454 | -1.40441 |
| 12  | C      | 2.48694  | 1.218459 | -1.31451 |
| 13  | H      | 3.050417 | 1.544046 | -0.44548 |
| 14  | H      | 3.033713 | 1.60492  | -2.18106 |
| 15  | C      | 0.58774  | 1.964737 | -2.61629 |
| 16  | H      | 1.392508 | 2.130894 | -3.33828 |
| 17  | H      | -0.0542  | 2.840776 | -2.65254 |
| 18  | O      | 0.714166 | -4.20562 | 0.705134 |
| 19  | O      | -0.38309 | -2.33274 | 0.207946 |
| 20  | C      | -0.25409 | 0.757079 | -3.01635 |
| 21  | H      | -0.2034  | 0.621324 | -4.10292 |
| 22  | H      | -1.29631 | 0.942555 | -2.76197 |
| 23  | O      | 0.817841 | -0.74255 | 2.341896 |
| 24  | C      | 1.579695 | -0.7706  | -2.54605 |
| 25  | H      | 1.930173 | -0.30206 | -3.47002 |
| 26  | H      | 1.690759 | -1.83906 | -2.70673 |

|    |   |          |          |          |
|----|---|----------|----------|----------|
| 27 | O | 2.754678 | -1.11354 | 3.377585 |
| 28 | C | 2.818621 | -0.51634 | 1.073408 |
| 29 | H | 2.95198  | 0.562121 | 1.096347 |
| 30 | H | 3.806992 | -0.97853 | 1.095428 |
| 31 | O | -1.8465  | 2.283138 | -0.18557 |
| 32 | C | 2.090301 | -0.83757 | 2.384531 |
| 33 | C | 1.249047 | 3.154001 | -0.61629 |
| 34 | H | 0.34769  | 3.718696 | -0.85342 |
| 35 | H | 2.106314 | 3.728062 | -0.97902 |
| 36 | O | -2.34774 | -0.63912 | -1.22544 |
| 37 | C | 1.28022  | 3.094828 | 0.91189  |
| 38 | O | -2.99502 | -2.21735 | -2.6533  |
| 39 | C | 3.943335 | -0.73152 | -1.75117 |
| 40 | H | 4.65377  | -0.31509 | -1.03773 |
| 41 | H | 4.052948 | -1.81502 | -1.74778 |
| 42 | C | -0.7185  | -1.57071 | -2.73271 |
| 43 | H | -0.31576 | -2.50477 | -2.34579 |
| 44 | H | -0.77825 | -1.65878 | -3.82236 |
| 45 | C | -2.14275 | -1.48014 | -2.18006 |
| 46 | O | -2.32432 | -0.04916 | 2.18496  |
| 47 | H | 4.216501 | -0.37133 | -2.74221 |
| 48 | H | -2.01302 | -0.58195 | 2.948453 |
| 49 | H | -3.10442 | -0.50009 | 1.800971 |
| 50 | H | -2.01337 | 2.700248 | 0.676574 |
| 51 | H | -2.70045 | 2.17655  | -0.64641 |
| 52 | O | -1.78236 | 2.796214 | 2.556038 |
| 53 | H | -2.1306  | 1.903973 | 2.687029 |
| 54 | H | -0.82526 | 2.667515 | 2.465006 |
| 55 | O | -4.05486 | 1.491618 | -1.55967 |
| 56 | H | -4.14846 | 1.771255 | -2.47066 |
| 57 | H | -3.60418 | 0.629333 | -1.58774 |
| 58 | O | -4.22524 | -1.27089 | 0.683915 |
| 59 | O | -1.02667 | -1.35874 | 4.157934 |
| 60 | H | -4.32268 | -2.21215 | 0.830634 |
| 61 | H | -3.65898 | -1.18231 | -0.10672 |
| 62 | H | -1.15159 | -2.30663 | 4.206189 |
| 63 | H | -0.21957 | -1.22033 | 3.612569 |

**Table S20.** Optimized Cartesian coordinates (Å) of the [Pr(AAZTA)(H<sub>2</sub>O)<sub>2</sub>]<sup>-</sup>•4H<sub>2</sub>O system obtained with DFT calculations (0 Imaginary Frequencies).

| Tag | Symbol | X        | Y        | Z        |
|-----|--------|----------|----------|----------|
| 1   | Pr     | -0.39548 | 0.11873  | 0.299356 |
| 2   | O      | 0.738138 | 2.050862 | 1.439879 |
| 3   | N      | 2.047861 | -0.91629 | -0.11151 |
| 4   | C      | 1.990042 | -2.39384 | -0.11965 |
| 5   | H      | 2.788132 | -2.80723 | 0.496653 |
| 6   | H      | 2.16422  | -2.78661 | -1.11851 |
| 7   | O      | 1.714417 | 4.050382 | 1.52662  |

|    |   |          |          |          |
|----|---|----------|----------|----------|
| 8  | N | 0.156427 | -0.47032 | -2.31884 |
| 9  | C | 0.664277 | -3.02669 | 0.332399 |
| 10 | N | 1.154583 | 1.841671 | -1.26496 |
| 11 | C | 2.513763 | -0.31434 | -1.40557 |
| 12 | C | 2.489333 | 1.219027 | -1.31953 |
| 13 | H | 3.054356 | 1.547014 | -0.45243 |
| 14 | H | 3.033795 | 1.603848 | -2.18817 |
| 15 | C | 0.587222 | 1.963216 | -2.61858 |
| 16 | H | 1.390468 | 2.129978 | -3.34204 |
| 17 | H | -0.05582 | 2.838443 | -2.65402 |
| 18 | O | 0.707638 | -4.19653 | 0.710936 |
| 19 | O | -0.38329 | -2.31906 | 0.217575 |
| 20 | C | -0.25347 | 0.753865 | -3.01571 |
| 21 | H | -0.20241 | 0.613733 | -4.10159 |
| 22 | H | -1.29578 | 0.939112 | -2.76192 |
| 23 | O | 0.812123 | -0.73107 | 2.331928 |
| 24 | C | 1.58059  | -0.77331 | -2.54455 |
| 25 | H | 1.928972 | -0.3072  | -3.47042 |
| 26 | H | 1.690187 | -1.84229 | -2.70265 |
| 27 | O | 2.743938 | -1.08545 | 3.382774 |
| 28 | C | 2.819485 | -0.50864 | 1.0738   |
| 29 | H | 2.957719 | 0.569226 | 1.091697 |
| 30 | H | 3.805786 | -0.9749  | 1.101183 |
| 31 | O | -1.83478 | 2.252366 | -0.17017 |
| 32 | C | 2.084601 | -0.82053 | 2.383383 |
| 33 | C | 1.246421 | 3.15103  | -0.61594 |
| 34 | H | 0.347447 | 3.717133 | -0.8585  |
| 35 | H | 2.106651 | 3.725956 | -0.96994 |
| 36 | O | -2.3263  | -0.62397 | -1.18645 |
| 37 | C | 1.26422  | 3.087523 | 0.911943 |
| 38 | O | -3.00061 | -2.20941 | -2.59314 |
| 39 | C | 3.945788 | -0.73261 | -1.75129 |
| 40 | H | 4.656122 | -0.31537 | -1.03819 |
| 41 | H | 4.054777 | -1.81616 | -1.74606 |
| 42 | C | -0.72328 | -1.56986 | -2.71388 |
| 43 | H | -0.31727 | -2.50477 | -2.33283 |
| 44 | H | -0.80031 | -1.65836 | -3.80234 |
| 45 | C | -2.13798 | -1.47266 | -2.13878 |
| 46 | O | -2.28644 | -0.05714 | 2.112118 |
| 47 | H | 4.219428 | -0.37409 | -2.74282 |
| 48 | H | -1.99398 | -0.58452 | 2.887931 |
| 49 | H | -3.08747 | -0.48653 | 1.74475  |
| 50 | H | -1.99988 | 2.675731 | 0.689004 |
| 51 | H | -2.68766 | 2.156834 | -0.63501 |
| 52 | O | -1.76894 | 2.76294  | 2.572166 |
| 53 | H | -2.1132  | 1.8651   | 2.671341 |
| 54 | H | -0.81202 | 2.63877  | 2.472542 |
| 55 | O | -4.04817 | 1.493657 | -1.55366 |
| 56 | H | -4.13448 | 1.769487 | -2.46654 |

|    |   |          |          |          |
|----|---|----------|----------|----------|
| 57 | H | -3.59716 | 0.63182  | -1.57419 |
| 58 | O | -4.24973 | -1.24429 | 0.677851 |
| 59 | O | -1.0478  | -1.35332 | 4.124475 |
| 60 | H | -4.35792 | -2.18274 | 0.834863 |
| 61 | H | -3.67407 | -1.17015 | -0.10726 |
| 62 | H | -1.17385 | -2.30111 | 4.172374 |
| 63 | H | -0.23093 | -1.21574 | 3.593454 |

**Table S21.** Optimized Cartesian coordinates (Å) of the [Nd(AAZTA)(H<sub>2</sub>O)<sub>2</sub>]<sup>-</sup>•4H<sub>2</sub>O system obtained with DFT calculations (0 Imaginary Frequencies).

| Tag | Symbol | X        | Y        | Z        |
|-----|--------|----------|----------|----------|
| 1   | Nd     | -0.38835 | 0.10004  | 0.281175 |
| 2   | O      | 0.688314 | 2.012757 | 1.446984 |
| 3   | N      | 2.044951 | -0.92124 | -0.12051 |
| 4   | C      | 1.987663 | -2.39892 | -0.13367 |
| 5   | H      | 2.782947 | -2.81414 | 0.484968 |
| 6   | H      | 2.166645 | -2.78832 | -1.13299 |
| 7   | O      | 1.675942 | 4.004053 | 1.57473  |
| 8   | N      | 0.159093 | -0.47074 | -2.32526 |
| 9   | C      | 0.659985 | -3.03267 | 0.310709 |
| 10  | N      | 1.149475 | 1.833247 | -1.25259 |
| 11  | C      | 2.514544 | -0.31522 | -1.41093 |
| 12  | C      | 2.486811 | 1.217029 | -1.31801 |
| 13  | H      | 3.055603 | 1.542841 | -0.45256 |
| 14  | H      | 3.02492  | 1.608018 | -2.18773 |
| 15  | C      | 0.577785 | 1.968135 | -2.60333 |
| 16  | H      | 1.37785  | 2.152974 | -3.32585 |
| 17  | H      | -0.074   | 2.837187 | -2.62405 |
| 18  | O      | 0.699823 | -4.20602 | 0.678133 |
| 19  | O      | -0.38549 | -2.32099 | 0.201883 |
| 20  | C      | -0.25241 | 0.756126 | -3.01644 |
| 21  | H      | -0.19187 | 0.623897 | -4.10274 |
| 22  | H      | -1.29764 | 0.933155 | -2.76961 |
| 23  | O      | 0.799345 | -0.74619 | 2.312755 |
| 24  | C      | 1.583746 | -0.77018 | -2.55304 |
| 25  | H      | 1.931344 | -0.29805 | -3.47614 |
| 26  | H      | 1.695441 | -1.8381  | -2.71681 |
| 27  | O      | 2.725406 | -1.09106 | 3.377207 |
| 28  | C      | 2.813037 | -0.51701 | 1.068157 |
| 29  | H      | 2.953675 | 0.56047  | 1.088593 |
| 30  | H      | 3.798454 | -0.98487 | 1.098384 |
| 31  | O      | -1.82824 | 2.214275 | -0.18449 |
| 32  | C      | 2.071521 | -0.8301  | 2.373055 |
| 33  | C      | 1.236969 | 3.134637 | -0.58675 |
| 34  | H      | 0.344303 | 3.707985 | -0.83496 |
| 35  | H      | 2.10436  | 3.710182 | -0.92104 |
| 36  | O      | -2.31571 | -0.63404 | -1.18496 |
| 37  | C      | 1.230806 | 3.052231 | 0.940066 |

|    |   |          |          |          |
|----|---|----------|----------|----------|
| 38 | O | -2.99416 | -2.21748 | -2.59215 |
| 39 | C | 3.947616 | -0.7306  | -1.75472 |
| 40 | H | 4.655646 | -0.3172  | -1.03712 |
| 41 | H | 4.057168 | -1.8141  | -1.7557  |
| 42 | C | -0.71961 | -1.56956 | -2.72491 |
| 43 | H | -0.3088  | -2.50673 | -2.35492 |
| 44 | H | -0.80275 | -1.64873 | -3.8136  |
| 45 | C | -2.13094 | -1.48006 | -2.14037 |
| 46 | O | -2.22699 | -0.01923 | 2.113724 |
| 47 | H | 4.223817 | -0.36602 | -2.74333 |
| 48 | H | -1.94254 | -0.53727 | 2.899479 |
| 49 | H | -3.0377  | -0.44225 | 1.759101 |
| 50 | H | -1.99423 | 2.649594 | 0.668811 |
| 51 | H | -2.67905 | 2.124722 | -0.65366 |
| 52 | O | -1.80085 | 2.787867 | 2.548702 |
| 53 | H | -2.14442 | 1.889299 | 2.646114 |
| 54 | H | -0.845   | 2.652858 | 2.454395 |
| 55 | O | -4.04555 | 1.474959 | -1.57622 |
| 56 | H | -4.1252  | 1.746306 | -2.49106 |
| 57 | H | -3.59551 | 0.612691 | -1.58918 |
| 58 | O | -4.2159  | -1.20368 | 0.714257 |
| 59 | O | -1.02972 | -1.31203 | 4.148603 |
| 60 | H | -4.33295 | -2.13754 | 0.89107  |
| 61 | H | -3.65048 | -1.15141 | -0.08017 |
| 62 | H | -1.18117 | -2.25567 | 4.204674 |
| 63 | H | -0.21934 | -1.19975 | 3.60122  |

**Table S22.** Optimized Cartesian coordinates (Å) of the  $[\text{Pm}(\text{AAZTA})(\text{H}_2\text{O})_2]^- \cdot 4\text{H}_2\text{O}$  system obtained with DFT calculations (0 Imaginary Frequencies).

| Tag | Symbol | X        | Y        | Z        |
|-----|--------|----------|----------|----------|
| 1   | Pm     | -0.37474 | 0.09984  | 0.27288  |
| 2   | O      | 0.678591 | 1.999226 | 1.443963 |
| 3   | N      | 2.044222 | -0.91408 | -0.12255 |
| 4   | C      | 1.985128 | -2.39191 | -0.13211 |
| 5   | H      | 2.779425 | -2.80656 | 0.488083 |
| 6   | H      | 2.164306 | -2.78395 | -1.13034 |
| 7   | O      | 1.65082  | 3.996922 | 1.585591 |
| 8   | N      | 0.158046 | -0.46854 | -2.32165 |
| 9   | C      | 0.656315 | -3.02226 | 0.313396 |
| 10  | N      | 1.146789 | 1.833487 | -1.25229 |
| 11  | C      | 2.514251 | -0.31155 | -1.41411 |
| 12  | C      | 2.485373 | 1.220566 | -1.32337 |
| 13  | H      | 3.057472 | 1.548252 | -0.46083 |
| 14  | H      | 3.018843 | 1.611358 | -2.19595 |
| 15  | C      | 0.570727 | 1.970801 | -2.60092 |
| 16  | H      | 1.367824 | 2.161065 | -3.32524 |
| 17  | H      | -0.08454 | 2.837274 | -2.61659 |
| 18  | O      | 0.693042 | -4.1968  | 0.677185 |

|    |   |          |          |          |
|----|---|----------|----------|----------|
| 19 | O | -0.38706 | -2.30683 | 0.209319 |
| 20 | C | -0.25587 | 0.756496 | -3.01481 |
| 21 | H | -0.19366 | 0.622936 | -4.10076 |
| 22 | H | -1.30168 | 0.930995 | -2.76912 |
| 23 | O | 0.796645 | -0.73661 | 2.303183 |
| 24 | C | 1.581981 | -0.76817 | -2.55399 |
| 25 | H | 1.926791 | -0.29645 | -3.47828 |
| 26 | H | 1.693563 | -1.83619 | -2.71716 |
| 27 | O | 2.719825 | -1.0686  | 3.377012 |
| 28 | C | 2.813167 | -0.50805 | 1.064964 |
| 29 | H | 2.957209 | 0.568959 | 1.082032 |
| 30 | H | 3.797125 | -0.97876 | 1.0972   |
| 31 | O | -1.814   | 2.197835 | -0.17774 |
| 32 | C | 2.068636 | -0.81531 | 2.369016 |
| 33 | C | 1.232321 | 3.132658 | -0.58189 |
| 34 | H | 0.342238 | 3.708561 | -0.83301 |
| 35 | H | 2.102339 | 3.708169 | -0.90908 |
| 36 | O | -2.30512 | -0.62606 | -1.16581 |
| 37 | C | 1.216863 | 3.044489 | 0.94424  |
| 38 | O | -2.99722 | -2.21292 | -2.56221 |
| 39 | C | 3.946905 | -0.72765 | -1.75777 |
| 40 | H | 4.655295 | -0.31386 | -1.04075 |
| 41 | H | 4.056093 | -1.81121 | -1.75791 |
| 42 | C | -0.72273 | -1.56785 | -2.71515 |
| 43 | H | -0.3096  | -2.50512 | -2.34813 |
| 44 | H | -0.81393 | -1.64718 | -3.80313 |
| 45 | C | -2.12894 | -1.47576 | -2.11974 |
| 46 | O | -2.19727 | -0.03504 | 2.085161 |
| 47 | H | 4.222801 | -0.36394 | -2.74679 |
| 48 | H | -1.91963 | -0.55444 | 2.872494 |
| 49 | H | -3.017   | -0.44658 | 1.737241 |
| 50 | H | -1.98193 | 2.633112 | 0.675203 |
| 51 | H | -2.66378 | 2.113241 | -0.64949 |
| 52 | O | -1.80175 | 2.771584 | 2.558254 |
| 53 | H | -2.14113 | 1.870425 | 2.645055 |
| 54 | H | -0.84569 | 2.639271 | 2.461961 |
| 55 | O | -4.03772 | 1.478238 | -1.57141 |
| 56 | H | -4.11673 | 1.747385 | -2.48696 |
| 57 | H | -3.59053 | 0.614657 | -1.58183 |
| 58 | O | -4.2194  | -1.19435 | 0.716532 |
| 59 | O | -1.027   | -1.33723 | 4.130367 |
| 60 | H | -4.34186 | -2.12753 | 0.893338 |
| 61 | H | -3.65194 | -1.14523 | -0.07653 |
| 62 | H | -1.17487 | -2.28232 | 4.169417 |
| 63 | H | -0.21522 | -1.21255 | 3.587692 |

**Table S23.** Optimized Cartesian coordinates (Å) of the [Sm(AAZTA)(H<sub>2</sub>O)<sub>2</sub>]<sup>-</sup> · 4H<sub>2</sub>O system obtained with DFT calculations (0 Imaginary Frequencies).

| Tag | Symbol | X        | Y        | Z        |
|-----|--------|----------|----------|----------|
| 1   | Sm     | -0.36478 | 0.101501 | 0.265331 |
| 2   | O      | 0.672446 | 1.989631 | 1.438223 |
| 3   | N      | 2.040926 | -0.908   | -0.12046 |
| 4   | C      | 1.977755 | -2.38592 | -0.12404 |
| 5   | H      | 2.768798 | -2.80017 | 0.500499 |
| 6   | H      | 2.159214 | -2.78268 | -1.11995 |
| 7   | O      | 1.635865 | 3.990649 | 1.58929  |
| 8   | N      | 0.158765 | -0.46957 | -2.3181  |
| 9   | C      | 0.645943 | -3.0102  | 0.320556 |
| 10  | N      | 1.146679 | 1.831442 | -1.2544  |
| 11  | C      | 2.514228 | -0.31207 | -1.41361 |
| 12  | C      | 2.485852 | 1.220019 | -1.32817 |
| 13  | H      | 3.060511 | 1.550622 | -0.46848 |
| 14  | H      | 3.016237 | 1.608289 | -2.2037  |
| 15  | C      | 0.568336 | 1.969555 | -2.60189 |
| 16  | H      | 1.363622 | 2.163719 | -3.32714 |
| 17  | H      | -0.08982 | 2.83384  | -2.61459 |
| 18  | O      | 0.676787 | -4.18565 | 0.681745 |
| 19  | O      | -0.39391 | -2.2893  | 0.218957 |
| 20  | C      | -0.25487 | 0.75292  | -3.01611 |
| 21  | H      | -0.18878 | 0.616086 | -4.10135 |
| 22  | H      | -1.3016  | 0.926313 | -2.77412 |
| 23  | O      | 0.789385 | -0.72338 | 2.295914 |
| 24  | C      | 1.582007 | -0.7714  | -2.55194 |
| 25  | H      | 1.926184 | -0.30217 | -3.47768 |
| 26  | H      | 1.692578 | -1.83994 | -2.71238 |
| 27  | O      | 2.708025 | -1.04254 | 3.381827 |
| 28  | C      | 2.81021  | -0.49938 | 1.066032 |
| 29  | H      | 2.959014 | 0.576949 | 1.078265 |
| 30  | H      | 3.792012 | -0.97424 | 1.101826 |
| 31  | O      | -1.79916 | 2.18479  | -0.17606 |
| 32  | C      | 2.061039 | -0.79796 | 2.3689   |
| 33  | C      | 1.231562 | 3.129643 | -0.58217 |
| 34  | H      | 0.344011 | 3.707989 | -0.83622 |
| 35  | H      | 2.10413  | 3.704024 | -0.90434 |
| 36  | O      | -2.29536 | -0.61735 | -1.15341 |
| 37  | C      | 1.208875 | 3.038191 | 0.943321 |
| 38  | O      | -3.00016 | -2.20682 | -2.54016 |
| 39  | C      | 3.946536 | -0.73132 | -1.75393 |
| 40  | H      | 4.654708 | -0.3162  | -1.03747 |
| 41  | H      | 4.05409  | -1.81505 | -1.75043 |
| 42  | C      | -0.72413 | -1.569   | -2.70636 |
| 43  | H      | -0.31101 | -2.50625 | -2.33934 |
| 44  | H      | -0.81983 | -1.6503  | -3.79377 |
| 45  | C      | -2.12681 | -1.47131 | -2.10478 |

|    |   |          |          |          |
|----|---|----------|----------|----------|
| 46 | O | -2.17519 | -0.04306 | 2.059693 |
| 47 | H | 4.224027 | -0.37125 | -2.74385 |
| 48 | H | -1.90358 | -0.56373 | 2.848276 |
| 49 | H | -3.0016  | -0.44524 | 1.716414 |
| 50 | H | -1.96757 | 2.619006 | 0.677461 |
| 51 | H | -2.64858 | 2.104414 | -0.64887 |
| 52 | O | -1.80043 | 2.761615 | 2.559804 |
| 53 | H | -2.13755 | 1.859028 | 2.639809 |
| 54 | H | -0.84416 | 2.630533 | 2.463158 |
| 55 | O | -4.03068 | 1.482787 | -1.57004 |
| 56 | H | -4.10496 | 1.750403 | -2.48645 |
| 57 | H | -3.58506 | 0.618486 | -1.57688 |
| 58 | O | -4.22259 | -1.18299 | 0.71428  |
| 59 | O | -1.02943 | -1.35165 | 4.115567 |
| 60 | H | -4.34814 | -2.11547 | 0.892604 |
| 61 | H | -3.65266 | -1.13694 | -0.07718 |
| 62 | H | -1.17282 | -2.29793 | 4.140619 |
| 63 | H | -0.21671 | -1.21566 | 3.576842 |

**Table S24.** Optimized Cartesian coordinates (Å) of the  $[\text{Eu}(\text{AAZTA})(\text{H}_2\text{O})_2]^- \cdot 4\text{H}_2\text{O}$  system obtained with DFT calculations (0 Imaginary Frequencies).

| Tag | Symbol | X        | Y        | Z        |
|-----|--------|----------|----------|----------|
| 1   | Eu     | -0.35725 | 0.098623 | 0.259042 |
| 2   | O      | 0.663819 | 1.974071 | 1.433752 |
| 3   | N      | 2.038276 | -0.90373 | -0.11942 |
| 4   | C      | 1.97324  | -2.38176 | -0.11918 |
| 5   | H      | 2.759774 | -2.79515 | 0.51153  |
| 6   | H      | 2.160688 | -2.78181 | -1.11264 |
| 7   | O      | 1.618152 | 3.978063 | 1.599011 |
| 8   | N      | 0.159494 | -0.47088 | -2.3153  |
| 9   | C      | 0.63833  | -3.00279 | 0.31974  |
| 10  | N      | 1.145803 | 1.828408 | -1.25441 |
| 11  | C      | 2.514332 | -0.31242 | -1.41351 |
| 12  | C      | 2.485765 | 1.219414 | -1.33156 |
| 13  | H      | 3.062851 | 1.552201 | -0.47435 |
| 14  | H      | 3.012909 | 1.606474 | -2.20954 |
| 15  | C      | 0.565121 | 1.968655 | -2.60048 |
| 16  | H      | 1.358486 | 2.167821 | -3.32645 |
| 17  | H      | -0.09627 | 2.830465 | -2.60931 |
| 18  | O      | 0.66362  | -4.1803  | 0.674268 |
| 19  | O      | -0.39828 | -2.27674 | 0.221749 |
| 20  | C      | -0.25416 | 0.749862 | -3.01654 |
| 21  | H      | -0.18394 | 0.611217 | -4.10124 |
| 22  | H      | -1.30188 | 0.921461 | -2.77818 |
| 23  | O      | 0.782362 | -0.71778 | 2.288183 |
| 24  | C      | 1.582251 | -0.77392 | -2.55058 |
| 25  | H      | 1.925689 | -0.30647 | -3.47749 |
| 26  | H      | 1.692341 | -1.84284 | -2.70886 |

|    |   |          |          |          |
|----|---|----------|----------|----------|
| 27 | O | 2.697304 | -1.01883 | 3.385822 |
| 28 | C | 2.807204 | -0.49309 | 1.066581 |
| 29 | H | 2.959921 | 0.582604 | 1.075116 |
| 30 | H | 3.787244 | -0.97125 | 1.105819 |
| 31 | O | -1.78432 | 2.168569 | -0.17785 |
| 32 | C | 2.053749 | -0.78491 | 2.36806  |
| 33 | C | 1.229097 | 3.124568 | -0.57833 |
| 34 | H | 0.343826 | 3.705245 | -0.83462 |
| 35 | H | 2.103975 | 3.69889  | -0.89414 |
| 36 | O | -2.2862  | -0.6121  | -1.14391 |
| 37 | C | 1.198686 | 3.026851 | 0.946273 |
| 38 | O | -3.00027 | -2.20664 | -2.51978 |
| 39 | C | 3.946549 | -0.73346 | -1.7511  |
| 40 | H | 4.654165 | -0.31777 | -1.03443 |
| 41 | H | 4.053336 | -1.81726 | -1.74593 |
| 42 | C | -0.72459 | -1.5703  | -2.70079 |
| 43 | H | -0.31022 | -2.50808 | -2.33674 |
| 44 | H | -0.82523 | -1.65066 | -3.78781 |
| 45 | C | -2.1236  | -1.47039 | -2.09219 |
| 46 | O | -2.15574 | -0.045   | 2.038248 |
| 47 | H | 4.225468 | -0.37508 | -2.74125 |
| 48 | H | -1.88965 | -0.56375 | 2.829972 |
| 49 | H | -2.98731 | -0.44026 | 1.699273 |
| 50 | H | -1.95204 | 2.607169 | 0.673441 |
| 51 | H | -2.63336 | 2.092837 | -0.65211 |
| 52 | O | -1.79999 | 2.756764 | 2.558299 |
| 53 | H | -2.13833 | 1.85414  | 2.631569 |
| 54 | H | -0.844   | 2.622692 | 2.463633 |
| 55 | O | -4.02087 | 1.485843 | -1.57204 |
| 56 | H | -4.09438 | 1.75092  | -2.48925 |
| 57 | H | -3.57865 | 0.619904 | -1.57599 |
| 58 | O | -4.2232  | -1.17017 | 0.713216 |
| 59 | O | -1.03169 | -1.34893 | 4.108775 |
| 60 | H | -4.35476 | -2.10142 | 0.893628 |
| 61 | H | -3.65216 | -1.12931 | -0.07772 |
| 62 | H | -1.17484 | -2.29524 | 4.13435  |
| 63 | H | -0.21821 | -1.2129  | 3.57105  |

**Table S25.** Optimized Cartesian coordinates (Å) of the  $[\text{Gd}(\text{AAZTA})(\text{H}_2\text{O})_2]^- \cdot 4\text{H}_2\text{O}$  system obtained with DFT calculations (0 Imaginary Frequencies).

| Tag | Symbol | X        | Y        | Z        |
|-----|--------|----------|----------|----------|
| 1   | Gd     | -0.35027 | 0.095537 | 0.254862 |
| 2   | O      | 0.658124 | 1.959774 | 1.431066 |
| 3   | N      | 2.03605  | -0.90057 | -0.11926 |
| 4   | C      | 1.969676 | -2.3787  | -0.11677 |
| 5   | H      | 2.7522   | -2.79163 | 0.519136 |
| 6   | H      | 2.162549 | -2.78085 | -1.10832 |
| 7   | O      | 1.604227 | 3.966414 | 1.608286 |

|    |   |          |          |          |
|----|---|----------|----------|----------|
| 8  | N | 0.159898 | -0.47149 | -2.31323 |
| 9  | C | 0.632107 | -2.99733 | 0.316316 |
| 10 | N | 1.1447   | 1.825733 | -1.25343 |
| 11 | C | 2.514195 | -0.31262 | -1.4137  |
| 12 | C | 2.485365 | 1.21899  | -1.33407 |
| 13 | H | 3.064671 | 1.553314 | -0.47898 |
| 14 | H | 3.009487 | 1.605388 | -2.21412 |
| 15 | C | 0.561746 | 1.968478 | -2.59813 |
| 16 | H | 1.353354 | 2.172442 | -3.32468 |
| 17 | H | -0.10248 | 2.828104 | -2.60303 |
| 18 | O | 0.652299 | -4.17749 | 0.662121 |
| 19 | O | -0.40137 | -2.26629 | 0.223618 |
| 20 | C | -0.25404 | 0.748054 | -3.01639 |
| 21 | H | -0.18043 | 0.608615 | -4.10073 |
| 22 | H | -1.3026  | 0.917862 | -2.78092 |
| 23 | O | 0.776789 | -0.71591 | 2.280972 |
| 24 | C | 1.582137 | -0.77536 | -2.54997 |
| 25 | H | 1.924985 | -0.30878 | -3.47752 |
| 26 | H | 1.691904 | -1.8445  | -2.70717 |
| 27 | O | 2.688795 | -0.99962 | 3.388371 |
| 28 | C | 2.804829 | -0.4888  | 1.06639  |
| 29 | H | 2.96109  | 0.586296 | 1.072259 |
| 30 | H | 3.783321 | -0.96986 | 1.108296 |
| 31 | O | -1.77111 | 2.153145 | -0.17727 |
| 32 | C | 2.047929 | -0.77544 | 2.366592 |
| 33 | C | 1.226932 | 3.119927 | -0.57388 |
| 34 | H | 0.343238 | 3.702521 | -0.83106 |
| 35 | H | 2.103348 | 3.694451 | -0.88486 |
| 36 | O | -2.27785 | -0.60719 | -1.13486 |
| 37 | C | 1.19098  | 3.016375 | 0.949816 |
| 38 | O | -3.00135 | -2.20347 | -2.50355 |
| 39 | C | 3.946376 | -0.7347  | -1.74948 |
| 40 | H | 4.653601 | -0.31849 | -1.0327  |
| 41 | H | 4.052925 | -1.81852 | -1.74318 |
| 42 | C | -0.72533 | -1.57061 | -2.6962  |
| 43 | H | -0.31026 | -2.50896 | -2.33455 |
| 44 | H | -0.8304  | -1.65026 | -3.78284 |
| 45 | C | -2.12107 | -1.46816 | -2.08155 |
| 46 | O | -2.13976 | -0.04483 | 2.021517 |
| 47 | H | 4.226171 | -0.37743 | -2.73979 |
| 48 | H | -1.8785  | -0.56261 | 2.815392 |
| 49 | H | -2.9748  | -0.43541 | 1.685299 |
| 50 | H | -1.9395  | 2.59654  | 0.671306 |
| 51 | H | -2.6191  | 2.081512 | -0.65407 |
| 52 | O | -1.79917 | 2.753029 | 2.558831 |
| 53 | H | -2.13814 | 1.850165 | 2.62559  |
| 54 | H | -0.8435  | 2.616839 | 2.46443  |
| 55 | O | -4.01148 | 1.488836 | -1.57402 |
| 56 | H | -4.08578 | 1.754062 | -2.49112 |

|    |   |          |          |          |
|----|---|----------|----------|----------|
| 57 | H | -3.57331 | 0.620991 | -1.57827 |
| 58 | O | -4.22315 | -1.15916 | 0.713664 |
| 59 | O | -1.03362 | -1.34833 | 4.102768 |
| 60 | H | -4.35991 | -2.08934 | 0.895783 |
| 61 | H | -3.6514  | -1.12287 | -0.07699 |
| 62 | H | -1.17831 | -2.29442 | 4.12767  |
| 63 | H | -0.2196  | -1.21301 | 3.565698 |

**Table S26.** Optimized Cartesian coordinates (Å) of the [Tb(AAZTA)(H<sub>2</sub>O)<sub>2</sub>]<sup>-</sup>•4H<sub>2</sub>O system obtained with DFT calculations (0 Imaginary Frequencies).

| Tag | Symbol | X        | Y        | Z        |
|-----|--------|----------|----------|----------|
| 1   | Tb     | -0.34306 | 0.092193 | 0.250033 |
| 2   | O      | 0.649826 | 1.9457   | 1.429137 |
| 3   | N      | 2.034553 | -0.8967  | -0.11979 |
| 4   | C      | 1.967132 | -2.37486 | -0.11474 |
| 5   | H      | 2.74594  | -2.78712 | 0.526074 |
| 6   | H      | 2.16501  | -2.7793  | -1.10436 |
| 7   | O      | 1.591119 | 3.95308  | 1.619892 |
| 8   | N      | 0.159348 | -0.47117 | -2.30976 |
| 9   | C      | 0.627181 | -2.991   | 0.313324 |
| 10  | N      | 1.143729 | 1.823716 | -1.25157 |
| 11  | C      | 2.513974 | -0.3119  | -1.41482 |
| 12  | C      | 2.484967 | 1.21936  | -1.33715 |
| 13  | H      | 3.067382 | 1.554998 | -0.48469 |
| 14  | H      | 3.005251 | 1.60527  | -2.21965 |
| 15  | C      | 0.557044 | 1.969364 | -2.59415 |
| 16  | H      | 1.345985 | 2.178162 | -3.32221 |
| 17  | H      | -0.11003 | 2.826738 | -2.59396 |
| 18  | O      | 0.642585 | -4.17329 | 0.651898 |
| 19  | O      | -0.40337 | -2.25547 | 0.224761 |
| 20  | C      | -0.25602 | 0.747552 | -3.0137  |
| 21  | H      | -0.18111 | 0.607777 | -4.09783 |
| 22  | H      | -1.30494 | 0.915609 | -2.77899 |
| 23  | O      | 0.772446 | -0.71369 | 2.272811 |
| 24  | C      | 1.580992 | -0.7755  | -2.54958 |
| 25  | H      | 1.922104 | -0.30937 | -3.47796 |
| 26  | H      | 1.690353 | -1.84478 | -2.70613 |
| 27  | O      | 2.681212 | -0.98194 | 3.389672 |
| 28  | C      | 2.803227 | -0.4834  | 1.065351 |
| 29  | H      | 2.961811 | 0.591291 | 1.068825 |
| 30  | H      | 3.780714 | -0.96628 | 1.109444 |
| 31  | O      | -1.75672 | 2.13816  | -0.18225 |
| 32  | C      | 2.043256 | -0.76617 | 2.364156 |
| 33  | C      | 1.225362 | 3.1155   | -0.56775 |
| 34  | H      | 0.34403  | 3.700929 | -0.82622 |
| 35  | H      | 2.10404  | 3.689605 | -0.87288 |
| 36  | O      | -2.26916 | -0.60425 | -1.12261 |
| 37  | C      | 1.182888 | 3.005313 | 0.954949 |

|    |   |          |          |          |
|----|---|----------|----------|----------|
| 38 | O | -3.0033  | -2.19935 | -2.48673 |
| 39 | C | 3.945812 | -0.73513 | -1.74997 |
| 40 | H | 4.653178 | -0.31901 | -1.03328 |
| 41 | H | 4.051833 | -1.81899 | -1.74333 |
| 42 | C | -0.7268  | -1.57019 | -2.69069 |
| 43 | H | -0.3104  | -2.50916 | -2.33232 |
| 44 | H | -0.8366  | -1.64835 | -3.77695 |
| 45 | C | -2.11897 | -1.46612 | -2.06947 |
| 46 | O | -2.12182 | -0.04309 | 2.004487 |
| 47 | H | 4.225876 | -0.37836 | -2.7404  |
| 48 | H | -1.8637  | -0.55926 | 2.800356 |
| 49 | H | -2.96    | -0.4305  | 1.672334 |
| 50 | H | -1.92571 | 2.585227 | 0.664291 |
| 51 | H | -2.60451 | 2.067912 | -0.65946 |
| 52 | O | -1.80448 | 2.754521 | 2.551891 |
| 53 | H | -2.14206 | 1.850989 | 2.615982 |
| 54 | H | -0.84841 | 2.617868 | 2.463563 |
| 55 | O | -4.00572 | 1.486415 | -1.57323 |
| 56 | H | -4.08009 | 1.747903 | -2.49141 |
| 57 | H | -3.5702  | 0.617354 | -1.57411 |
| 58 | O | -4.21941 | -1.15625 | 0.718181 |
| 59 | O | -1.03374 | -1.35035 | 4.09501  |
| 60 | H | -4.35293 | -2.086   | 0.904876 |
| 61 | H | -3.64723 | -1.122   | -0.07222 |
| 62 | H | -1.18174 | -2.29612 | 4.111932 |
| 63 | H | -0.21951 | -1.21373 | 3.55844  |

**Table S27.** Optimized Cartesian coordinates (Å) of the  $[\text{Dy}(\text{AAZTA})(\text{H}_2\text{O})_2]^- \cdot 4\text{H}_2\text{O}$  system obtained with DFT calculations (0 Imaginary Frequencies).

| Tag | Symbol | X        | Y        | Z        |
|-----|--------|----------|----------|----------|
| 1   | Dy     | -0.33627 | 0.089171 | 0.246744 |
| 2   | O      | 0.644514 | 1.930621 | 1.426898 |
| 3   | N      | 2.032556 | -0.89162 | -0.12122 |
| 4   | C      | 1.964336 | -2.36994 | -0.1139  |
| 5   | H      | 2.738886 | -2.78131 | 0.532544 |
| 6   | H      | 2.168422 | -2.77656 | -1.10133 |
| 7   | O      | 1.578901 | 3.939684 | 1.630789 |
| 8   | N      | 0.158274 | -0.47006 | -2.30763 |
| 9   | C      | 0.622053 | -2.9844  | 0.308037 |
| 10  | N      | 1.141256 | 1.822685 | -1.25053 |
| 11  | C      | 2.512969 | -0.30983 | -1.41707 |
| 12  | C      | 2.483204 | 1.221086 | -1.34146 |
| 13  | H      | 3.068892 | 1.558316 | -0.49189 |
| 14  | H      | 2.999156 | 1.606677 | -2.22662 |
| 15  | C      | 0.550533 | 1.971552 | -2.59073 |
| 16  | H      | 1.336437 | 2.187115 | -3.32011 |
| 17  | H      | -0.12053 | 2.825739 | -2.58454 |
| 18  | O      | 0.633202 | -4.16902 | 0.638469 |

|    |   |          |          |          |
|----|---|----------|----------|----------|
| 19 | O | -0.40596 | -2.24489 | 0.224186 |
| 20 | C | -0.25801 | 0.747525 | -3.01303 |
| 21 | H | -0.17948 | 0.60737  | -4.09682 |
| 22 | H | -1.30793 | 0.912871 | -2.78139 |
| 23 | O | 0.769361 | -0.71192 | 2.26444  |
| 24 | C | 1.579316 | -0.77493 | -2.55014 |
| 25 | H | 1.918808 | -0.30974 | -3.47957 |
| 26 | H | 1.688415 | -1.84443 | -2.70543 |
| 27 | O | 2.6756   | -0.96241 | 3.389759 |
| 28 | C | 2.802129 | -0.47718 | 1.062968 |
| 29 | H | 2.963551 | 0.596995 | 1.064108 |
| 30 | H | 3.778391 | -0.96236 | 1.108519 |
| 31 | O | -1.74484 | 2.12314  | -0.17895 |
| 32 | C | 2.039919 | -0.75603 | 2.360816 |
| 33 | C | 1.222041 | 3.111835 | -0.5621  |
| 34 | H | 0.342014 | 3.699274 | -0.82017 |
| 35 | H | 2.101853 | 3.686649 | -0.8625  |
| 36 | O | -2.26177 | -0.59994 | -1.11286 |
| 37 | C | 1.175651 | 2.994247 | 0.959536 |
| 38 | O | -3.00503 | -2.19612 | -2.4706  |
| 39 | C | 3.944662 | -0.73363 | -1.75144 |
| 40 | H | 4.65199  | -0.31711 | -1.03496 |
| 41 | H | 4.05067  | -1.81748 | -1.74424 |
| 42 | C | -0.72882 | -1.56891 | -2.68663 |
| 43 | H | -0.31105 | -2.50856 | -2.33185 |
| 44 | H | -0.84336 | -1.64536 | -3.77251 |
| 45 | C | -2.11744 | -1.46357 | -2.05875 |
| 46 | O | -2.10416 | -0.04648 | 1.990673 |
| 47 | H | 4.224803 | -0.37746 | -2.74208 |
| 48 | H | -1.84827 | -0.56368 | 2.786502 |
| 49 | H | -2.9458  | -0.42922 | 1.661879 |
| 50 | H | -1.91383 | 2.571799 | 0.666711 |
| 51 | H | -2.5921  | 2.05678  | -0.65739 |
| 52 | O | -1.80366 | 2.747865 | 2.555158 |
| 53 | H | -2.1401  | 1.843563 | 2.613788 |
| 54 | H | -0.84755 | 2.61113  | 2.468703 |
| 55 | O | -3.99959 | 1.488262 | -1.57154 |
| 56 | H | -4.0719  | 1.748618 | -2.4902  |
| 57 | H | -3.56735 | 0.617691 | -1.57059 |
| 58 | O | -4.21687 | -1.15039 | 0.721458 |
| 59 | O | -1.03089 | -1.35998 | 4.086803 |
| 60 | H | -4.35181 | -2.0796  | 0.909789 |
| 61 | H | -3.64432 | -1.11849 | -0.06875 |
| 62 | H | -1.17888 | -2.30586 | 4.096524 |
| 63 | H | -0.21679 | -1.21943 | 3.551076 |

**Table S28.** Optimized Cartesian coordinates (Å) of the [Ho(AAZTA)(H<sub>2</sub>O)<sub>2</sub>]<sup>-</sup>•4H<sub>2</sub>O system obtained with DFT calculations (0 Imaginary Frequencies).

| Tag | Symbol | X        | Y        | Z        |
|-----|--------|----------|----------|----------|
| 1   | Ho     | -0.31617 | -0.00477 | 0.250928 |
| 2   | O      | 0.670974 | 1.741207 | 1.441656 |
| 3   | N      | 2.04442  | -0.95018 | -0.15324 |
| 4   | C      | 1.981413 | -2.42811 | -0.20002 |
| 5   | H      | 2.764313 | -2.86032 | 0.422339 |
| 6   | H      | 2.17579  | -2.798   | -1.20366 |
| 7   | O      | 0.771531 | 3.940932 | 1.699899 |
| 8   | N      | 0.160891 | -0.47055 | -2.31315 |
| 9   | C      | 0.646047 | -3.06277 | 0.214304 |
| 10  | N      | 1.142781 | 1.809435 | -1.2102  |
| 11  | C      | 2.518155 | -0.31794 | -1.4283  |
| 12  | C      | 2.48411  | 1.211905 | -1.29776 |
| 13  | H      | 3.052481 | 1.516806 | -0.42532 |
| 14  | H      | 3.016516 | 1.626686 | -2.16042 |
| 15  | C      | 0.55926  | 1.972314 | -2.55097 |
| 16  | H      | 1.350929 | 2.173928 | -3.27847 |
| 17  | H      | -0.09863 | 2.836353 | -2.54993 |
| 18  | O      | 0.664887 | -4.25872 | 0.500606 |
| 19  | O      | -0.38582 | -2.32504 | 0.168176 |
| 20  | C      | -0.26855 | 0.764127 | -2.97918 |
| 21  | H      | -0.21669 | 0.649728 | -4.06782 |
| 22  | H      | -1.31145 | 0.929283 | -2.71809 |
| 23  | O      | 0.794633 | -0.88305 | 2.239936 |
| 24  | C      | 1.583819 | -0.75133 | -2.57412 |
| 25  | H      | 1.913586 | -0.24929 | -3.48753 |
| 26  | H      | 1.703904 | -1.81298 | -2.76977 |
| 27  | O      | 2.708494 | -1.12638 | 3.354224 |
| 28  | C      | 2.819101 | -0.57811 | 1.041441 |
| 29  | H      | 2.975206 | 0.495728 | 1.081013 |
| 30  | H      | 3.796545 | -1.06276 | 1.063548 |
| 31  | O      | -1.71143 | 2.032122 | -0.19713 |
| 32  | C      | 2.064964 | -0.90573 | 2.331972 |
| 33  | C      | 1.178355 | 3.075655 | -0.47202 |
| 34  | H      | 0.407649 | 3.737967 | -0.85705 |
| 35  | H      | 2.132485 | 3.597616 | -0.5889  |
| 36  | O      | -2.24668 | -0.6652  | -1.09471 |
| 37  | C      | 0.869598 | 2.917242 | 1.014935 |
| 38  | O      | -2.98511 | -2.22989 | -2.49274 |
| 39  | C      | 3.950903 | -0.72324 | -1.78089 |
| 40  | H      | 4.659182 | -0.32129 | -1.05701 |
| 41  | H      | 4.063976 | -1.80621 | -1.80305 |
| 42  | C      | -0.71983 | -1.56658 | -2.71504 |
| 43  | H      | -0.28662 | -2.51243 | -2.39724 |
| 44  | H      | -0.84893 | -1.60919 | -3.80117 |
| 45  | C      | -2.10268 | -1.49959 | -2.06627 |

|    |   |          |          |          |
|----|---|----------|----------|----------|
| 46 | O | -2.00681 | 0.039799 | 2.037097 |
| 47 | H | 4.223672 | -0.33882 | -2.76303 |
| 48 | H | -1.76665 | -0.44799 | 2.85574  |
| 49 | H | -2.87636 | -0.30497 | 1.743067 |
| 50 | H | -1.91374 | 2.517865 | 0.624077 |
| 51 | H | -2.53384 | 1.97592  | -0.7155  |
| 52 | O | -1.93339 | 2.99227  | 2.383642 |
| 53 | H | -1.89206 | 2.046788 | 2.575604 |
| 54 | H | -1.01603 | 3.302156 | 2.427012 |
| 55 | O | -3.95141 | 1.436174 | -1.65513 |
| 56 | H | -3.99695 | 1.657592 | -2.58569 |
| 57 | H | -3.54542 | 0.554993 | -1.60815 |
| 58 | O | -4.16827 | -1.03286 | 0.808585 |
| 59 | O | -0.9661  | -1.2376  | 4.171264 |
| 60 | H | -4.33853 | -1.94351 | 1.050917 |
| 61 | H | -3.60023 | -1.06868 | 0.014421 |
| 62 | H | -1.2052  | -2.16025 | 4.260861 |
| 63 | H | -0.17256 | -1.21789 | 3.586804 |

**Table S29.** Optimized Cartesian coordinates (Å) of the [Er(AAZTA)(H<sub>2</sub>O)]<sup>-</sup> · 5H<sub>2</sub>O system obtained with DFT calculations (0 Imaginary Frequencies).

| Tag | Symbol | X        | Y        | Z        |
|-----|--------|----------|----------|----------|
| 1   | Er     | 0.129578 | -0.00303 | 0.343766 |
| 2   | O      | 1.344839 | -1.90378 | 0.848414 |
| 3   | N      | -2.43246 | -0.11114 | -0.071   |
| 4   | C      | -2.97615 | 1.245044 | 0.150758 |
| 5   | H      | -3.36193 | 1.291572 | 1.169866 |
| 6   | H      | -3.8212  | 1.463129 | -0.49952 |
| 7   | O      | 1.572419 | -4.11729 | 0.941018 |
| 8   | N      | -0.37498 | 0.420427 | -2.19986 |
| 9   | C      | -1.96664 | 2.392823 | 0.070358 |
| 10  | N      | -0.54312 | -2.04925 | -1.07874 |
| 11  | C      | -2.5621  | -0.59405 | -1.48388 |
| 12  | C      | -1.9172  | -1.98758 | -1.60529 |
| 13  | H      | -2.53217 | -2.72631 | -1.09868 |
| 14  | H      | -1.9341  | -2.276   | -2.65881 |
| 15  | C      | 0.439865 | -1.95026 | -2.16755 |
| 16  | H      | 0.351523 | -2.81187 | -2.83745 |
| 17  | H      | 1.436696 | -1.9847  | -1.72978 |
| 18  | O      | -2.38322 | 3.513939 | -0.20056 |
| 19  | O      | -0.75711 | 2.095592 | 0.344493 |
| 20  | C      | 0.278056 | -0.65827 | -2.9691  |
| 21  | H      | -0.28757 | -0.83699 | -3.88653 |
| 22  | H      | 1.26819  | -0.32751 | -3.27191 |
| 23  | O      | -1.07745 | -0.54253 | 2.239098 |
| 24  | C      | -1.83336 | 0.402827 | -2.39755 |

|    |   |          |          |          |
|----|---|----------|----------|----------|
| 25 | H | -2.0766  | 0.159355 | -3.43589 |
| 26 | H | -2.22426 | 1.401822 | -2.22057 |
| 27 | O | -2.94347 | -1.09942 | 3.31672  |
| 28 | C | -3.01324 | -1.00982 | 0.936346 |
| 29 | H | -2.88076 | -2.05029 | 0.651895 |
| 30 | H | -4.08499 | -0.85266 | 1.062123 |
| 31 | O | 3.713474 | -1.16468 | -1.8046  |
| 32 | C | -2.31956 | -0.86614 | 2.293306 |
| 33 | C | -0.27198 | -3.24859 | -0.28419 |
| 34 | H | -0.19092 | -4.14456 | -0.90487 |
| 35 | H | -1.0923  | -3.40754 | 0.417179 |
| 36 | O | 1.868926 | 0.982868 | -0.91193 |
| 37 | C | 0.997863 | -3.10741 | 0.564823 |
| 38 | O | 2.04627  | 3.048779 | -1.71067 |
| 39 | C | -4.01365 | -0.71684 | -1.95171 |
| 40 | H | -4.59523 | -1.3299  | -1.26449 |
| 41 | H | -4.49844 | 0.253469 | -2.04255 |
| 42 | C | 0.233761 | 1.719344 | -2.49885 |
| 43 | H | -0.45674 | 2.518683 | -2.24063 |
| 44 | H | 0.480478 | 1.833033 | -3.55824 |
| 45 | C | 1.490825 | 1.955276 | -1.66309 |
| 46 | O | 1.5327   | 1.006145 | 1.993136 |
| 47 | H | -4.04811 | -1.18973 | -2.93254 |
| 48 | H | 1.215712 | 0.999029 | 2.917923 |
| 49 | H | 1.861266 | 1.897427 | 1.768561 |
| 50 | H | 3.935066 | -1.40968 | -0.89138 |
| 51 | H | 3.131086 | -0.40672 | -1.6898  |
| 52 | O | 4.094342 | -1.47375 | 1.005515 |
| 53 | H | 4.199303 | -0.5088  | 1.014639 |
| 54 | H | 3.140541 | -1.6329  | 1.107261 |
| 55 | O | 4.365646 | 1.254354 | 0.401027 |
| 56 | H | 4.216986 | 2.00036  | 0.987758 |
| 57 | H | 3.537359 | 1.209959 | -0.10591 |
| 58 | O | 2.568171 | 3.391173 | 1.047392 |
| 59 | O | 0.2982   | 0.486968 | 4.344878 |
| 60 | H | 2.236724 | 4.229246 | 1.369374 |
| 61 | H | 2.418924 | 3.386585 | 0.083639 |
| 62 | H | -0.19362 | 1.185247 | 4.777422 |
| 63 | H | -0.33862 | 0.041882 | 3.750906 |

**Table S30.** Optimized Cartesian coordinates (Å) of the [Tm(AAZTA)(H<sub>2</sub>O)]<sup>-</sup> · 5H<sub>2</sub>O system obtained with DFT calculations (0 Imaginary Frequencies).

| Tag | Symbol | X        | Y        | Z        |
|-----|--------|----------|----------|----------|
| 1   | Tm     | 0.119196 | 0.001631 | 0.334542 |
| 2   | O      | 1.351731 | -1.87393 | 0.836353 |
| 3   | N      | -2.43596 | -0.10485 | -0.07474 |
| 4   | C      | -2.9753  | 1.253362 | 0.14382  |
| 5   | H      | -3.36324 | 1.302858 | 1.161959 |

|      |          |          |          |
|------|----------|----------|----------|
| 6 H  | -3.8178  | 1.474213 | -0.50887 |
| 7 O  | 1.574427 | -4.08616 | 0.964013 |
| 8 N  | -0.37771 | 0.418489 | -2.20281 |
| 9 C  | -1.96038 | 2.396127 | 0.064684 |
| 10 N | -0.54509 | -2.04128 | -1.07384 |
| 11 C | -2.56546 | -0.59138 | -1.48605 |
| 12 C | -1.91908 | -1.98471 | -1.60177 |
| 13 H | -2.53302 | -2.72284 | -1.09305 |
| 14 H | -1.93436 | -2.27722 | -2.65411 |
| 15 C | 0.437438 | -1.95063 | -2.16368 |
| 16 H | 0.346723 | -2.81551 | -2.82892 |
| 17 H | 1.434289 | -1.98377 | -1.72622 |
| 18 O | -2.37055 | 3.519718 | -0.20486 |
| 19 O | -0.75223 | 2.091959 | 0.338398 |
| 20 C | 0.275414 | -0.66178 | -2.96991 |
| 21 H | -0.29074 | -0.84331 | -3.88641 |
| 22 H | 1.2652   | -0.33148 | -3.27431 |
| 23 O | -1.06851 | -0.55382 | 2.221916 |
| 24 C | -1.83574 | 0.402579 | -2.40218 |
| 25 H | -2.07848 | 0.156647 | -3.44    |
| 26 H | -2.22551 | 1.402536 | -2.22809 |
| 27 O | -2.92861 | -1.10205 | 3.313821 |
| 28 C | -3.01877 | -1       | 0.934512 |
| 29 H | -2.9005  | -2.04109 | 0.646236 |
| 30 H | -4.08772 | -0.8317  | 1.068781 |
| 31 O | 3.715581 | -1.16579 | -1.79608 |
| 32 C | -2.31263 | -0.86817 | 2.285837 |
| 33 C | -0.27275 | -3.23248 | -0.26784 |
| 34 H | -0.19454 | -4.13528 | -0.87884 |
| 35 H | -1.09052 | -3.38249 | 0.438482 |
| 36 O | 1.860941 | 0.97041  | -0.90865 |
| 37 C | 1.000539 | -3.08112 | 0.574038 |
| 38 O | 2.054431 | 3.03401  | -1.71022 |
| 39 C | -4.01674 | -0.71552 | -1.95366 |
| 40 H | -4.59815 | -1.32746 | -1.26527 |
| 41 H | -4.50168 | 0.254629 | -2.04584 |
| 42 C | 0.234897 | 1.715524 | -2.50059 |
| 43 H | -0.45302 | 2.517209 | -2.24266 |
| 44 H | 0.483789 | 1.829164 | -3.55944 |
| 45 C | 1.491305 | 1.944509 | -1.66226 |
| 46 O | 1.520999 | 0.995439 | 1.974719 |
| 47 H | -4.05124 | -1.19001 | -2.93373 |
| 48 H | 1.218453 | 0.974305 | 2.903884 |
| 49 H | 1.847545 | 1.889373 | 1.758196 |
| 50 H | 3.940508 | -1.40792 | -0.88302 |
| 51 H | 3.126207 | -0.41326 | -1.6807  |
| 52 O | 4.099659 | -1.46135 | 1.017143 |
| 53 H | 4.208159 | -0.49683 | 1.01969  |
| 54 H | 3.143884 | -1.61411 | 1.111302 |

|    |   |          |          |          |
|----|---|----------|----------|----------|
| 55 | O | 4.362125 | 1.26388  | 0.398649 |
| 56 | H | 4.20833  | 2.009937 | 0.984023 |
| 57 | H | 3.53191  | 1.208945 | -0.10404 |
| 58 | O | 2.555229 | 3.38844  | 1.048854 |
| 59 | O | 0.324626 | 0.433471 | 4.33688  |
| 60 | H | 2.214565 | 4.223762 | 1.368356 |
| 61 | H | 2.411116 | 3.381603 | 0.084381 |
| 62 | H | -0.16384 | 1.120697 | 4.790398 |
| 63 | H | -0.31777 | 0.000269 | 3.740259 |

**Table S31.** Optimized Cartesian coordinates (Å) of the [Yb(AAZTA)(H<sub>2</sub>O)]<sup>-</sup> · 5H<sub>2</sub>O system obtained with DFT calculations (0 Imaginary Frequencies).

| Tag | Symbol | X        | Y        | Z        |
|-----|--------|----------|----------|----------|
| 1   | Yb     | 0.100412 | 0.135232 | 0.361013 |
| 2   | O      | 1.412898 | -1.62731 | 0.910136 |
| 3   | N      | -2.42664 | -0.07753 | -0.05225 |
| 4   | C      | -3.0196  | 1.263754 | 0.133809 |
| 5   | H      | -3.42198 | 1.318105 | 1.146    |
| 6   | H      | -3.86188 | 1.439909 | -0.53246 |
| 7   | O      | 2.010992 | -3.75878 | 0.755092 |
| 8   | N      | -0.379   | 0.471066 | -2.19037 |
| 9   | C      | -2.048   | 2.442945 | 0.043437 |
| 10  | N      | -0.44645 | -1.95607 | -1.01434 |
| 11  | C      | -2.52824 | -0.60044 | -1.45297 |
| 12  | C      | -1.8258  | -1.97137 | -1.53055 |
| 13  | H      | -2.4049  | -2.71682 | -0.99258 |
| 14  | H      | -1.83721 | -2.29722 | -2.57309 |
| 15  | C      | 0.519782 | -1.85749 | -2.11738 |
| 16  | H      | 0.456904 | -2.74326 | -2.7576  |
| 17  | H      | 1.521959 | -1.83864 | -1.69296 |
| 18  | O      | -2.50058 | 3.547435 | -0.23622 |
| 19  | O      | -0.82864 | 2.18763  | 0.317765 |
| 20  | C      | 0.301424 | -0.59743 | -2.94845 |
| 21  | H      | -0.27219 | -0.81795 | -3.85141 |
| 22  | H      | 1.275277 | -0.24184 | -3.27496 |
| 23  | O      | -1.06278 | -0.40164 | 2.260377 |
| 24  | C      | -1.83504 | 0.407028 | -2.38636 |
| 25  | H      | -2.07306 | 0.138866 | -3.4196  |
| 26  | H      | -2.25748 | 1.395894 | -2.22467 |
| 27  | O      | -2.90879 | -0.98406 | 3.358556 |
| 28  | C      | -2.97992 | -0.97071 | 0.97564  |
| 29  | H      | -2.80896 | -2.01306 | 0.720023 |
| 30  | H      | -4.05686 | -0.84822 | 1.094115 |
| 31  | O      | 3.737102 | -0.85759 | -2.07572 |
| 32  | C      | -2.29367 | -0.76377 | 2.327036 |
| 33  | C      | -0.09675 | -3.10851 | -0.17971 |
| 34  | H      | -0.01518 | -4.02999 | -0.76074 |
| 35  | H      | -0.86599 | -3.2524  | 0.580587 |

|    |   |          |          |          |
|----|---|----------|----------|----------|
| 36 | O | 1.833721 | 1.063936 | -0.87938 |
| 37 | C | 1.223597 | -2.83518 | 0.554317 |
| 38 | O | 2.086238 | 3.071018 | -1.79884 |
| 39 | C | -3.97079 | -0.79456 | -1.92354 |
| 40 | H | -4.52989 | -1.41677 | -1.2259  |
| 41 | H | -4.49514 | 0.152661 | -2.03666 |
| 42 | C | 0.211283 | 1.77521  | -2.49448 |
| 43 | H | -0.47692 | 2.56843  | -2.2109  |
| 44 | H | 0.433622 | 1.899969 | -3.55778 |
| 45 | C | 1.488653 | 2.005462 | -1.68297 |
| 46 | O | 1.44552  | 1.249779 | 1.998902 |
| 47 | H | -3.98075 | -1.28885 | -2.89431 |
| 48 | H | 1.094785 | 1.269279 | 2.913488 |
| 49 | H | 1.702964 | 2.158026 | 1.724852 |
| 50 | H | 3.987806 | -1.40955 | -1.31586 |
| 51 | H | 3.129507 | -0.20656 | -1.7078  |
| 52 | O | 4.414199 | -2.20044 | 0.327606 |
| 53 | H | 4.238993 | -1.32246 | 0.707102 |
| 54 | H | 3.646802 | -2.73855 | 0.576811 |
| 55 | O | 3.994323 | 0.500709 | 1.022525 |
| 56 | H | 3.283086 | 0.545905 | 1.673776 |
| 57 | H | 3.546032 | 0.832602 | 0.233854 |
| 58 | O | 2.31691  | 3.613935 | 0.982109 |
| 59 | O | 0.194877 | 0.801403 | 4.341847 |
| 60 | H | 1.697602 | 4.335786 | 1.095673 |
| 61 | H | 2.350353 | 3.458587 | 0.021256 |
| 62 | H | -0.34455 | 1.494324 | 4.723378 |
| 63 | H | -0.40244 | 0.286509 | 3.763179 |

**Table S32.** Optimized Cartesian coordinates (Å) of the Lu(AAZTA)(H<sub>2</sub>O)]<sup>-</sup> · 5H<sub>2</sub>O system obtained with DFT calculations (0 Imaginary Frequencies).

| Tag | Symbol | X        | Y        | Z        |
|-----|--------|----------|----------|----------|
| 1   | Lu     | 0.095422 | 0.137509 | 0.351431 |
| 2   | O      | 1.415162 | -1.60737 | 0.901535 |
| 3   | N      | -2.42641 | -0.07598 | -0.0533  |
| 4   | C      | -3.01773 | 1.265975 | 0.132261 |
| 5   | H      | -3.42171 | 1.321005 | 1.14374  |
| 6   | H      | -3.85848 | 1.44399  | -0.53543 |
| 7   | O      | 2.010637 | -3.74126 | 0.771707 |
| 8   | N      | -0.38302 | 0.470389 | -2.1913  |
| 9   | C      | -2.04311 | 2.442429 | 0.04361  |
| 10  | N      | -0.44727 | -1.95131 | -1.01196 |
| 11  | C      | -2.53074 | -0.60079 | -1.4527  |
| 12  | C      | -1.82681 | -1.97086 | -1.52789 |
| 13  | H      | -2.40436 | -2.71623 | -0.98821 |
| 14  | H      | -1.83775 | -2.29906 | -2.56965 |
| 15  | C      | 0.517456 | -1.85699 | -2.11667 |
| 16  | H      | 0.451823 | -2.74395 | -2.75485 |

|    |   |          |          |          |
|----|---|----------|----------|----------|
| 17 | H | 1.520213 | -1.8386  | -1.69396 |
| 18 | O | -2.49227 | 3.549137 | -0.23222 |
| 19 | O | -0.82406 | 2.182281 | 0.315323 |
| 20 | C | 0.298564 | -0.59786 | -2.94897 |
| 21 | H | -0.27469 | -0.81922 | -3.85189 |
| 22 | H | 1.272068 | -0.24141 | -3.27554 |
| 23 | O | -1.05142 | -0.40523 | 2.248353 |
| 24 | C | -1.8389  | 0.405556 | -2.388   |
| 25 | H | -2.07654 | 0.135822 | -3.42087 |
| 26 | H | -2.26176 | 1.394485 | -2.22776 |
| 27 | O | -2.89029 | -0.98617 | 3.358994 |
| 28 | C | -2.97828 | -0.96754 | 0.97665  |
| 29 | H | -2.8142  | -2.0105  | 0.719238 |
| 30 | H | -4.05386 | -0.83988 | 1.101413 |
| 31 | O | 3.732853 | -0.85689 | -2.06996 |
| 32 | C | -2.28247 | -0.76496 | 2.323326 |
| 33 | C | -0.09543 | -3.09908 | -0.17197 |
| 34 | H | -0.01252 | -4.02334 | -0.74834 |
| 35 | H | -0.86391 | -3.24049 | 0.589529 |
| 36 | O | 1.825103 | 1.061252 | -0.87841 |
| 37 | C | 1.224638 | -2.8189  | 0.559629 |
| 38 | O | 2.086098 | 3.065415 | -1.8019  |
| 39 | C | -3.97381 | -0.7965  | -1.92047 |
| 40 | H | -4.53094 | -1.41896 | -1.22147 |
| 41 | H | -4.49929 | 0.150205 | -2.03285 |
| 42 | C | 0.207097 | 1.774365 | -2.49601 |
| 43 | H | -0.4806  | 2.567993 | -2.2123  |
| 44 | H | 0.429226 | 1.898878 | -3.55934 |
| 45 | C | 1.484342 | 2.00239  | -1.68422 |
| 46 | O | 1.437094 | 1.244095 | 1.984126 |
| 47 | H | -3.98512 | -1.29117 | -2.89104 |
| 48 | H | 1.093207 | 1.258605 | 2.901185 |
| 49 | H | 1.693406 | 2.153509 | 1.713405 |
| 50 | H | 3.986064 | -1.40756 | -1.31    |
| 51 | H | 3.121627 | -0.20917 | -1.70213 |
| 52 | O | 4.417512 | -2.19499 | 0.334003 |
| 53 | H | 4.246053 | -1.31511 | 0.710926 |
| 54 | H | 3.648444 | -2.72926 | 0.58651  |
| 55 | O | 3.993415 | 0.50681  | 1.021955 |
| 56 | H | 3.274886 | 0.546035 | 1.665716 |
| 57 | H | 3.549349 | 0.834502 | 0.229336 |
| 58 | O | 2.311492 | 3.612376 | 0.978048 |
| 59 | O | 0.211795 | 0.777113 | 4.337082 |
| 60 | H | 1.692606 | 4.334843 | 1.089861 |
| 61 | H | 2.346845 | 3.456479 | 0.017352 |
| 62 | H | -0.32813 | 1.462707 | 4.730911 |
| 63 | H | -0.38706 | 0.266823 | 3.755902 |

## References:

- [1] R. B. Lauffer, *Chem. Rev.*, 1987, **87**, 901–927.
- [2] E. Tóth, L. Helm and A. Merbach, in *The Chemistry of Contrast Agents in Medical Magnetic Resonance Imaging*, ed. A. Merbach, L. Helm and E. Tóth, John Wiley & Sons, Chichester, 2nd edn, 2013, pp. 25–81.
- [3] P. Caravan, C. T. Farrar, L. Frullano and R. Uppal, *Contrast Media Mol. Imaging*, 2009, **4**, 89–100.
- [4] S. Aime, M. Botta, D. Esteban-Gómez and C. Platas-Iglesias, *Mol. Phys.*, 2019, **117**, 898–909.
- [5] L. Helm, in *Contrast Agents for MRI: Experimental Methods*, ed. V. C. Pierre and M. J. Allen, Royal Society of Chemistry, Cambridge, 2017, pp. 122–127.
- [6] J. A. Peters, J. Huskens and D. J. Raber, *Prog. Nucl. Magn. Reson. Spectrosc.*, 1996, **28**, 283–350.
- [7] L. Vander Elst, A. Roch, P. Gillis, S. Laurent, F. Botteman, J. W. M. Bulte and R. N. Muller, *Magn. Reson. Med.*, 2002, **47**, 1121–1130.
- [8] S. Karimi and L. Helm, *Inorg. Chem.*, 2016, **55**, 4555–4563.
- [9] D. Cicolari, F. Santanni, L. Grassi, F. Brero, M. Filibian, T. Recca, P. Arosio, M. Perfetti, M. Mariani, R. Sessoli and A. Lascialfari, *J. Chem. Phys.*, 2021, **155**, 214201.
- [10] I. Bertini, F. Capozzi, C. Luchinat, G. Nicastro and Z. Xia, *J. Phys. Chem.*, 1993, **97**, 6351–6354.
- [11] P. H. Fries and E. Belorizky, *J. Chem. Phys.*, 2012, **136**, 074513.
- [12] L. P. Hwang and J. H. Freed, *J. Chem. Phys.*, 1975, **63**, 118–130.
- [13] J. H. Freed, *J. Chem. Phys.*, 1978, **68**, 4034–4037.
- [14] Y. Ayant, E. Belorizky, P. Fries and J. Rosset, *J. Phys.*, 1977, **38**, 325–337.
- [15] H. J. Eyring, *J. Chem. Phys.*, 1935, **3**, 107–115.
- [16] D. R. Lide, *CRC Handbook of Chemistry and Physics: A Ready-reference Book of Chemical and Physical Data*, CRC Press, 1995.
- [17] B. Bleaney, *J. Magn. Reson.*, 1972, **8**, 91–100.
- [18] A. M. Funk, K.-L. N. A. Finney, P. Harvey, A. M. Kenwright, E. R. Neil, N. J. Rogers, P. K. Senanayake and D. Parker, *Chem. Sci.*, 2015, **6**, 1655–1662.
- [19] D. F. Evans, *J. Chem. Soc.*, 1959, 2003–2005.
- [20] D. M. Corsi, C. Platas-Iglesias, H. van Bekkum and J. A. Peters, *Magn. Reson. Chem.*, 2001, **39**, 723–726.
- [21] M. J. Frisch, G. W. Trucks, H. B. Schlegel, G. E. Scuseria, M. A. Robb, J. R. Cheeseman, G. Scalmani, V. Barone, G. A. Petersson, H. Nakatsuji, X. Li, M. Caricato, A. V. Marenich, J. Bloino, B. G. Janesko, R. Gomperts, B. Mennucci, H. P. Hratchian, J. V. Ortiz, A. F. Izmaylov, J. L. Sonnenberg, D. Williams-Young, F. Ding, F. Lipparini, F. Egidi, J. Goings, B. Peng, A. Petrone, T. Henderson, D. Ranasinghe, V. G. Zakrzewski, J. Gao, N. Rega, G. Zheng, W. Liang, M. Hada, M. Ehara, K. Toyota, R. Fukuda, J. Hasegawa, M. Ishida, T. Nakajima, Y. Honda, O. Kitao, H. Nakai, T. Vreven, K. Throssell, J. A. Montgomery Jr., J. E. Peralta, F. Ogliaro, M. J. Bearpark, J. J. Heyd, E. N. Brothers, K. N. Kudin, V. N. Staroverov, T. A. Keith, R. Kobayashi, J. Normand, K. Raghavachari, A. P. Rendell, J. C. Burant, S. S. Iyengar, J. Tomasi, M. Cossi, J. M. Millam, M. Klene, C. Adamo, R. Cammi, J. W. Ochterski, R. L. Martin, K. Morokuma, O. Farkas, J. B. Foresman and D. J. Fox, *Gaussian 16 Rev. C.01*, Gaussian, Inc., Wallingford, CT, 2016.
- [22] J.-D. Chai and M. Head-Gordon, *Phys. Chem. Chem. Phys.*, 2008, **10**, 6615–6620.
- [23] M. Dolg, H. Stoll, A. Savin and H. Preuss, *Theor. Chim. Acta*, 1989, **75**, 173–194.
- [24] J. Tomasi, B. Mennucci and R. Cammi, *Chem. Rev.*, 2005, **105**, 2999–3094.
- [25] T. Lu, *J. Chem. Phys.*, 2024, **161**, 082503. 25 T. Lu and F. Chen, *J. Comput. Chem.*, 2012, **33**, 580–592.
- [26] K. Micskei, L. Helm, E. Brucher and A. E. Merbach, Oxygen-17 NMR study of water exchange on gadolinium polyaminopolyacetates  $[\text{Gd}(\text{DTPA})(\text{H}_2\text{O})]^{2-}$  and  $[\text{Gd}(\text{DOTA})(\text{H}_2\text{O})]^-$  related to NMR imaging, *Inorg. Chem.*, 1993, **32**, 3844–3850.

- [27] D. H. Powell, O. M. N. Dhubhghaill, D. Pubanz, L. Helm, Y. S. Lebedev, W. Schlaepfer and A. E. Merbach, Structural and Dynamic Parameters Obtained from  $^{17}\text{O}$  NMR, EPR, and NMRD Studies of Monomeric and Dimeric  $\text{Gd}^{3+}$  Complexes of Interest in Magnetic Resonance Imaging: An Integrated and Theoretically Self-Consistent Approach, *J. Am. Chem. Soc.*, 1996, **118**, 9333–9346.
- [28] K. I. Hardcastle, M. Botta, M. Fasano and G. Digilio, Experimental Evidence for a Second Coordination Sphere Water Molecule in the Hydration Structure of YbDTPA – Insights for a Re-Assessment of the Relaxivity Data of GdDTPA, *Eur. J. Inorg. Chem.*, 2000, **2000**, 971–977.
- [29] D. Lalli, F. Carniato, L. Tei, C. Platas-Iglesias and M. Botta, Surprising Complexity of the  $[\text{Gd}(\text{AAZTA})(\text{H}_2\text{O})_2]^-$  Chelate Revealed by NMR in the Frequency and Time Domains, *Inorg. Chem.*, 2022, **61**, 496–506.
